# Supplementary material for: Inferring HIV-1 transmission networks and sources of epidemic spread in Africa with deep-sequence phylogenetic analysis
Source: Nat Commun. 2019 Mar 29;10:1411. doi: 10.1038/s41467-019-09139-4 (PMC6441045; doi:10.1038/s41467-019-09139-4)

Deep sequence phylogenies

from two females RkA04565F, RkA05315F (run 38)

with near identical and intermingled subgraphs.

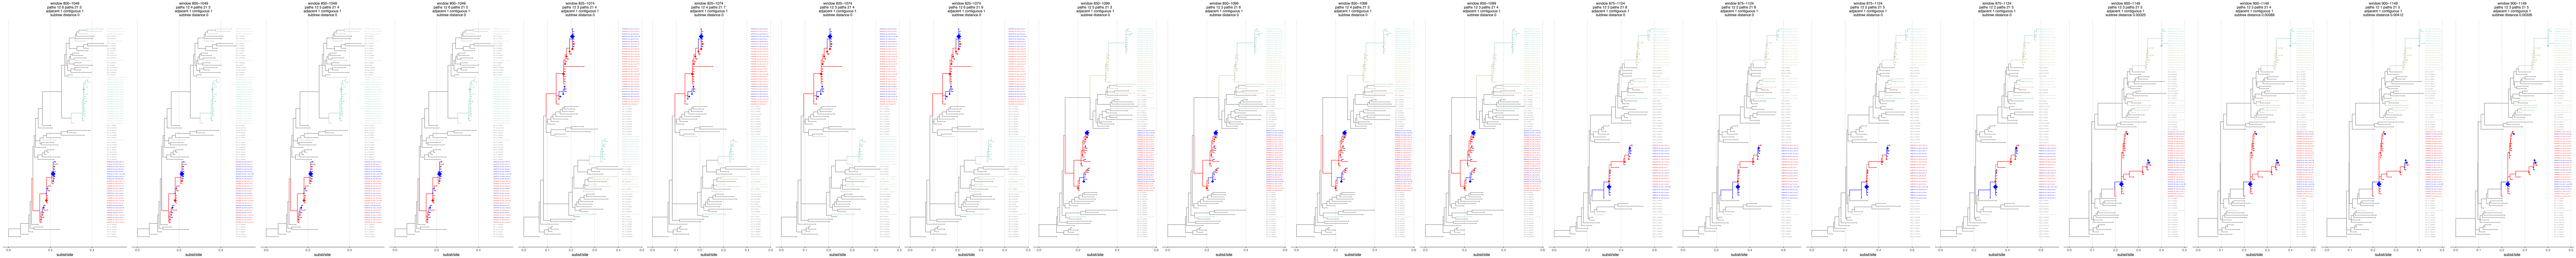

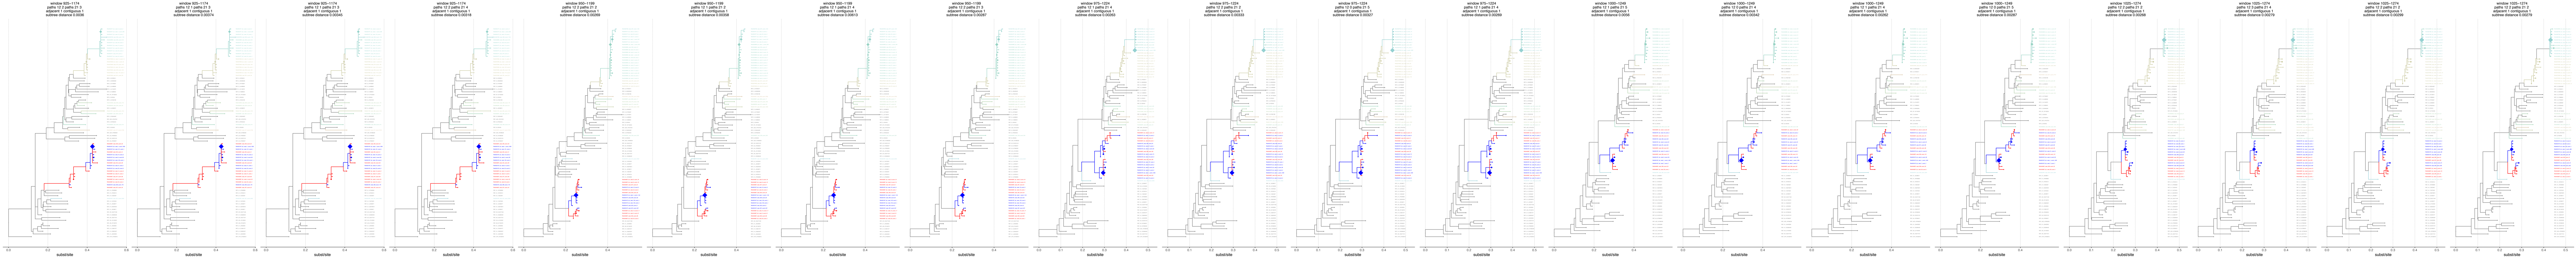

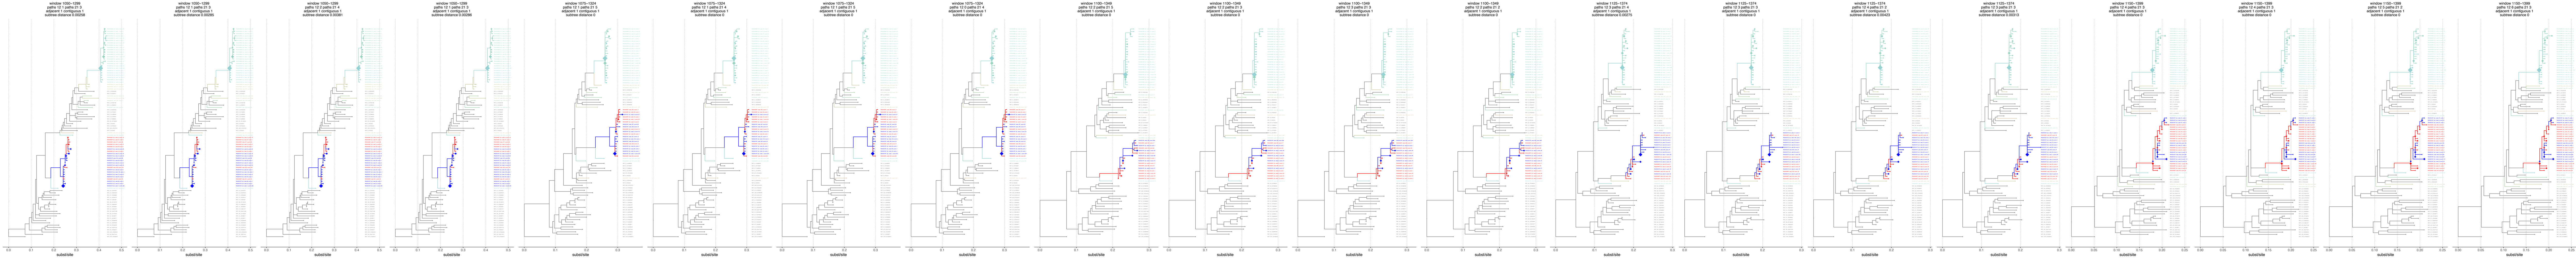

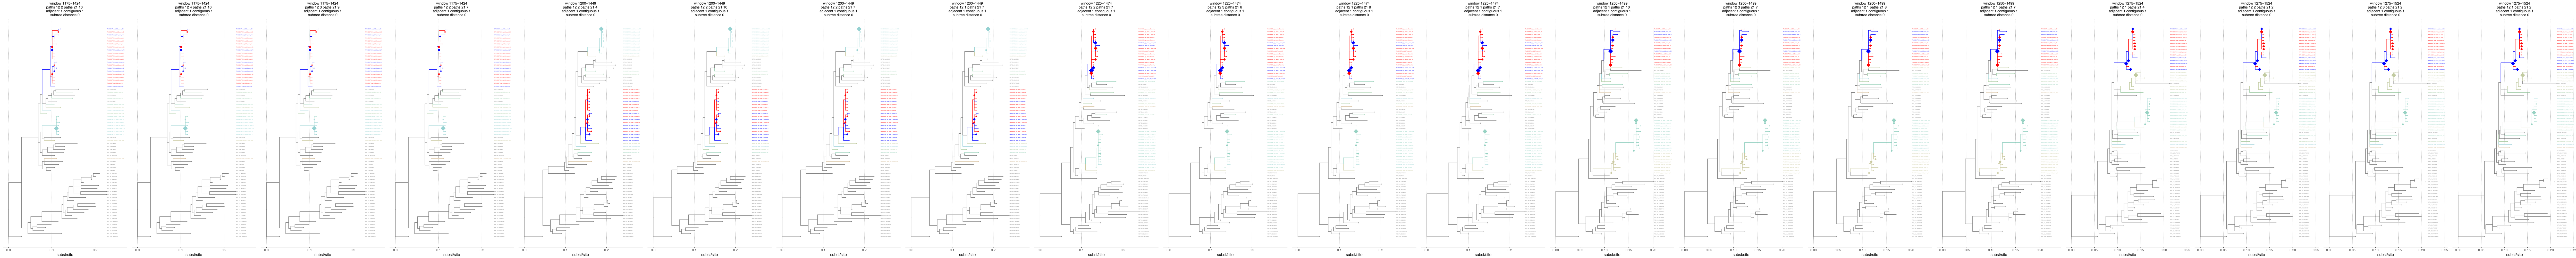

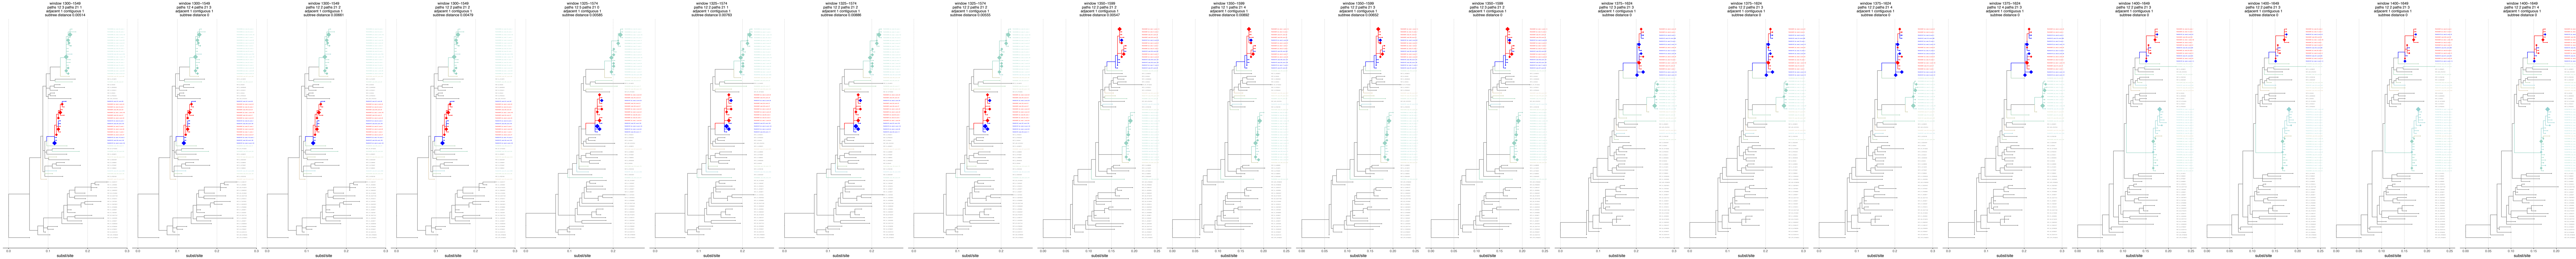

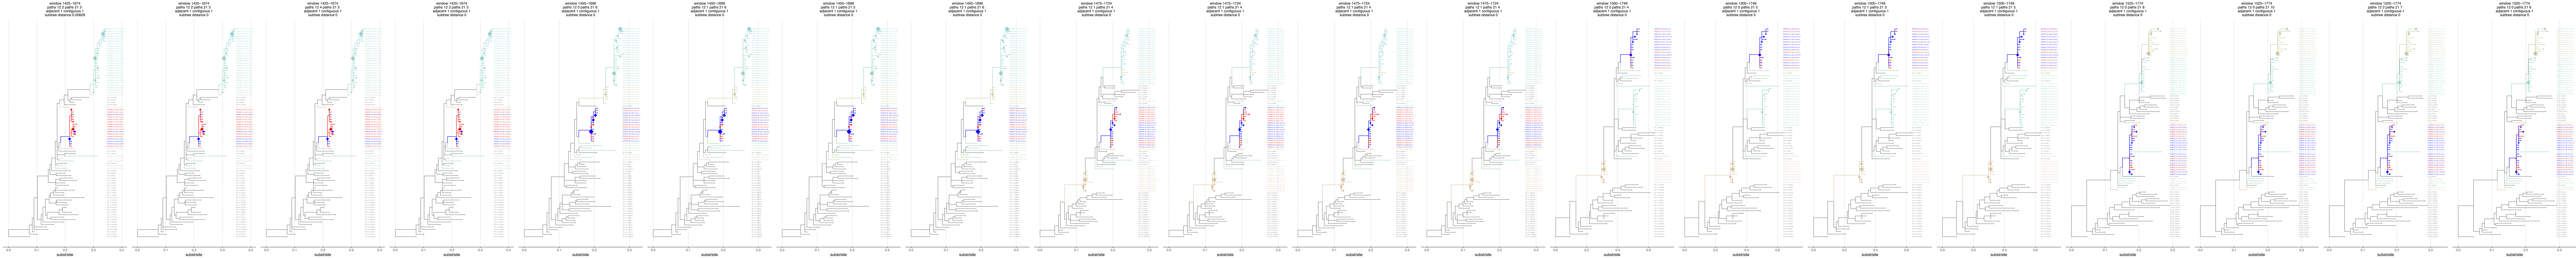

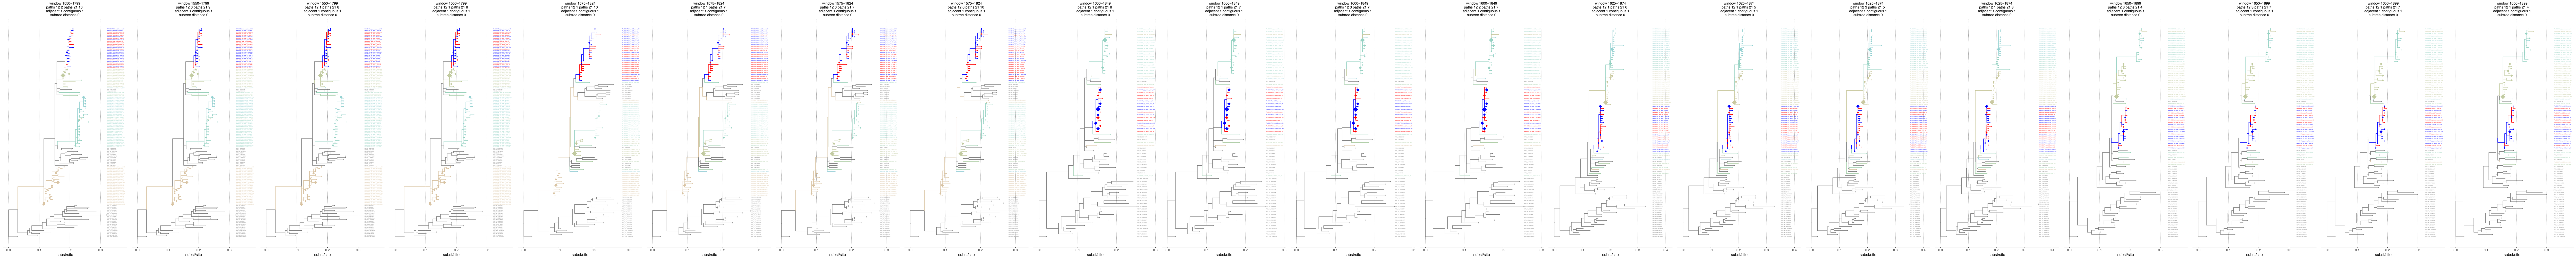

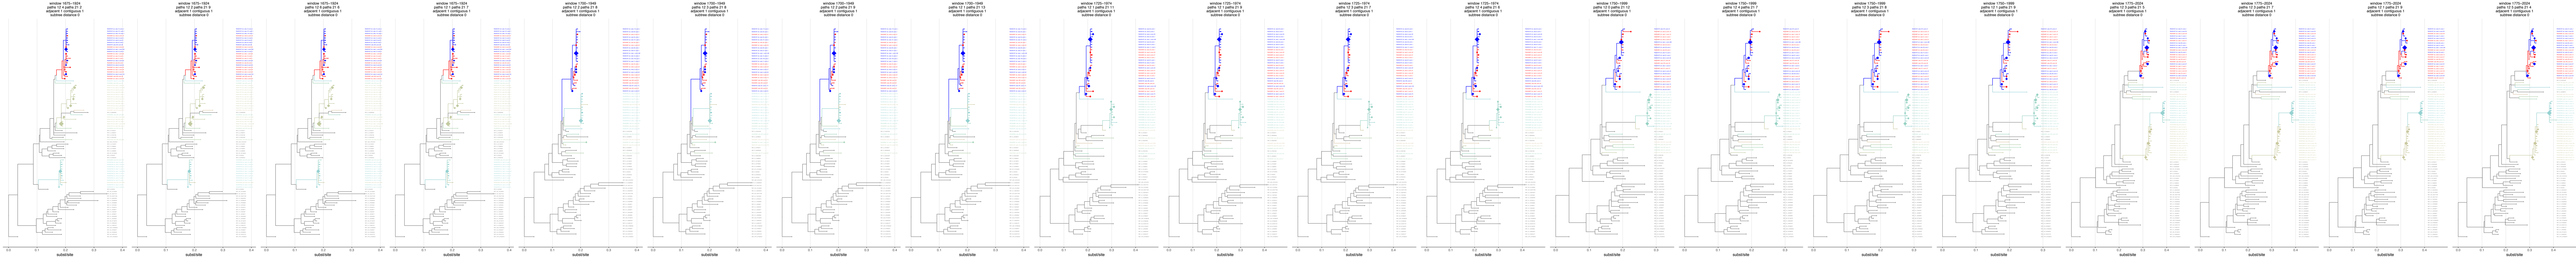

Deep sequence phylogenies  
from two females RkA01255F, RkA06631F (run 275)  
with near identical and intermingled subgraphs.

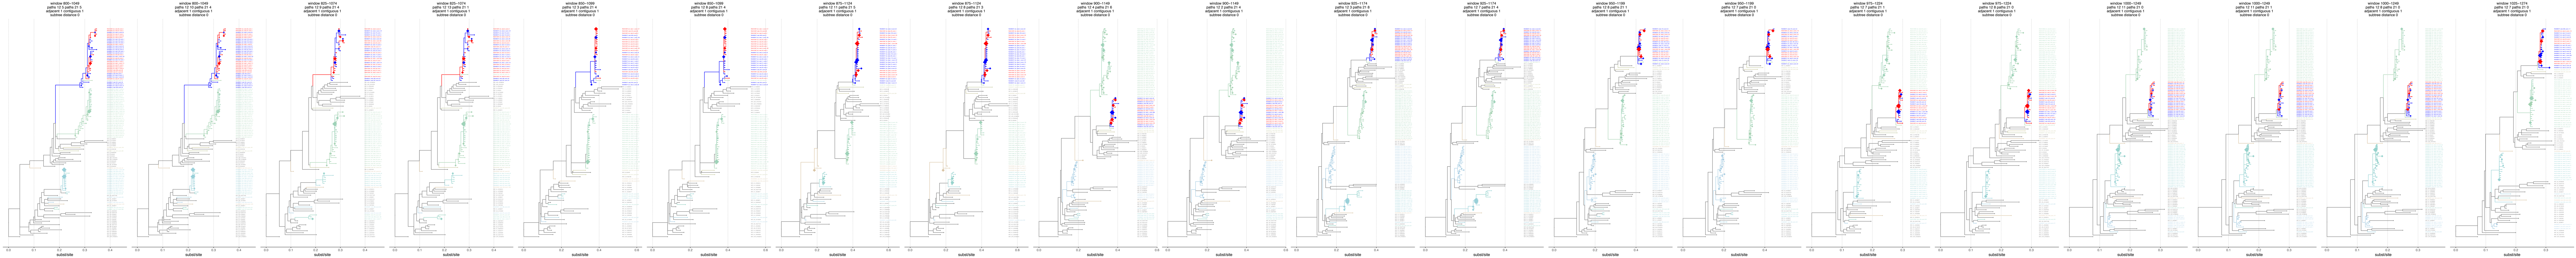

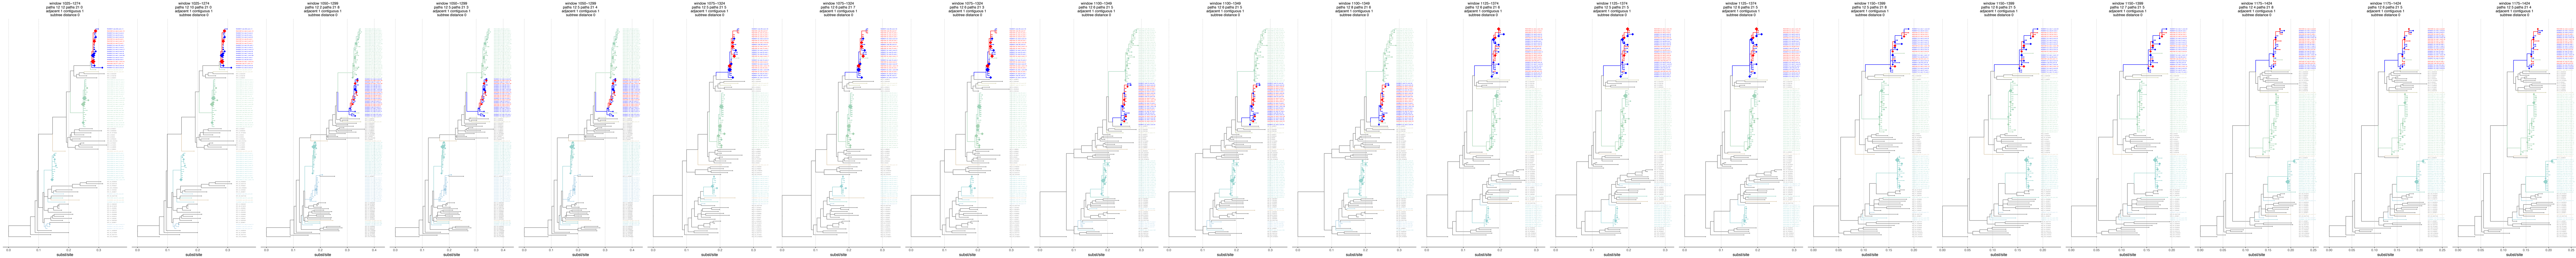

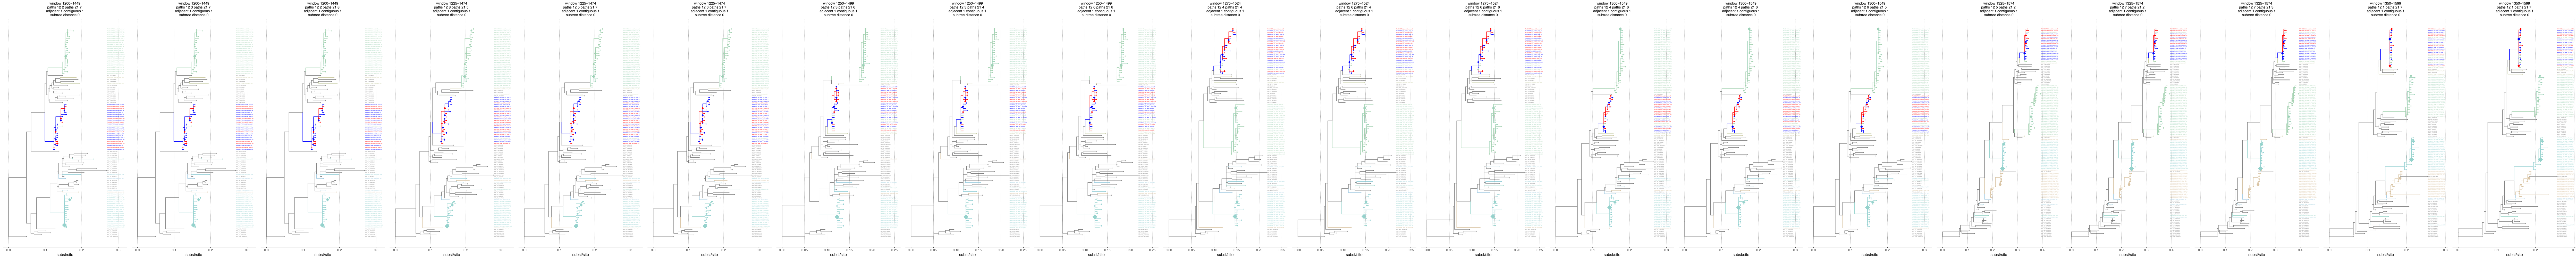

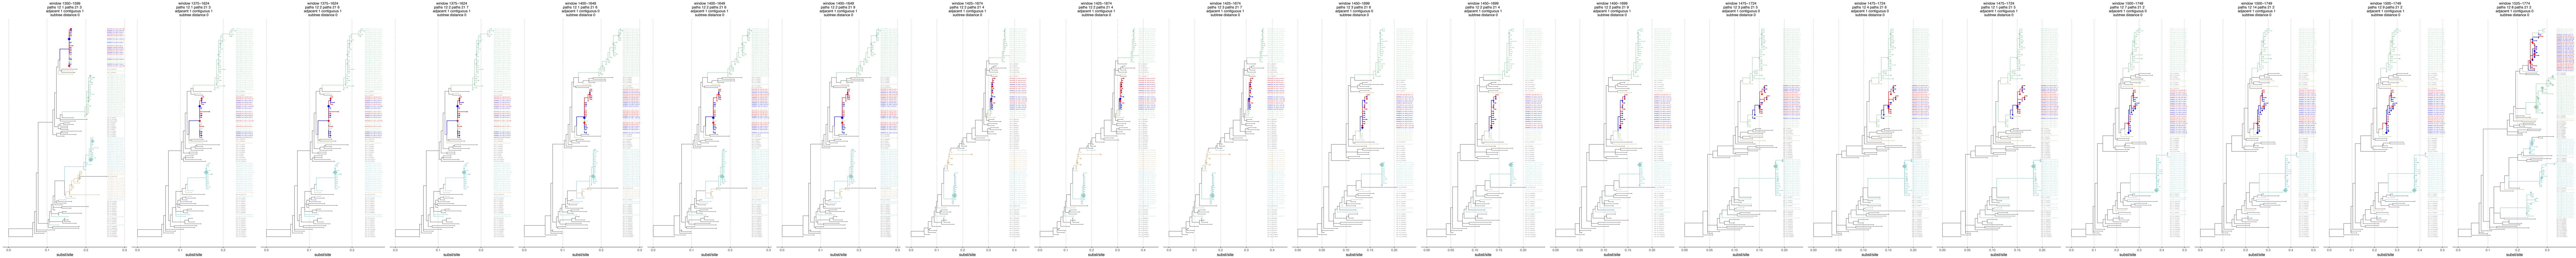

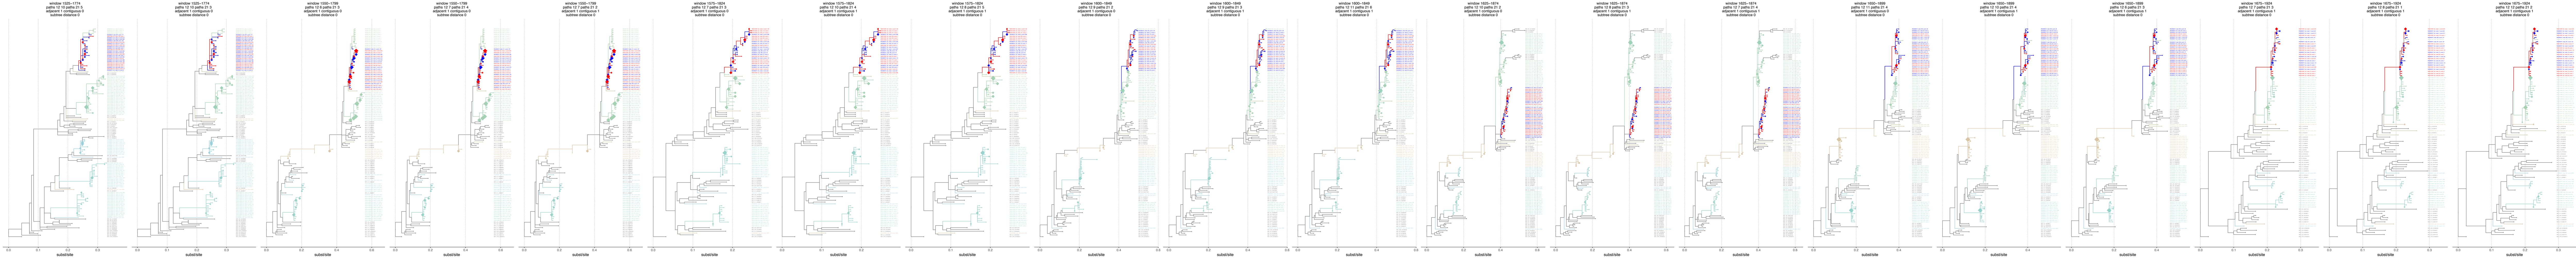

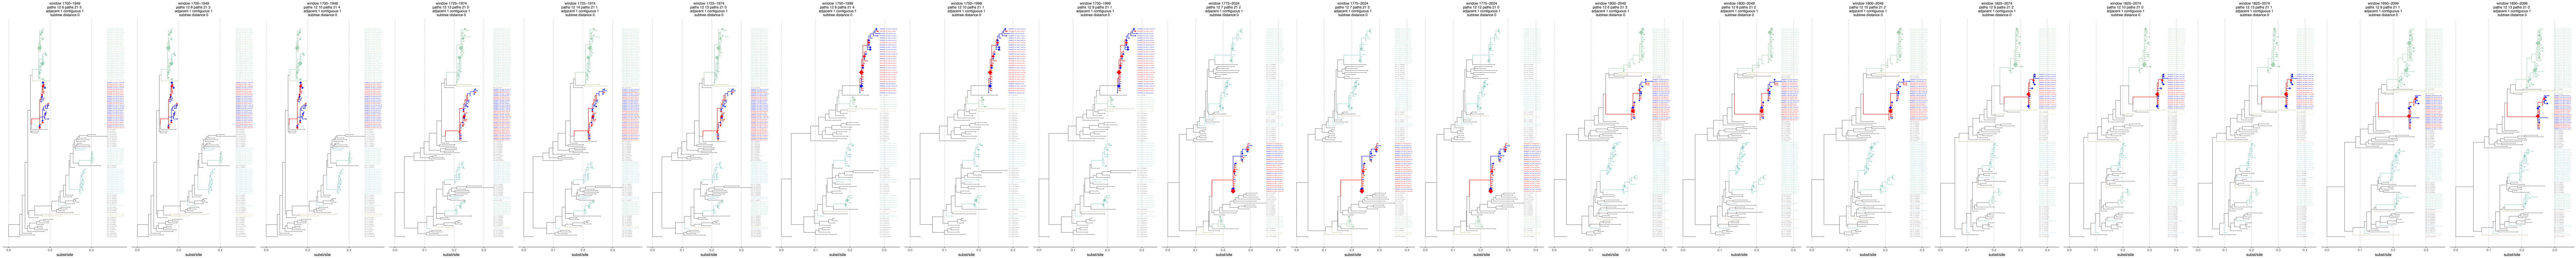

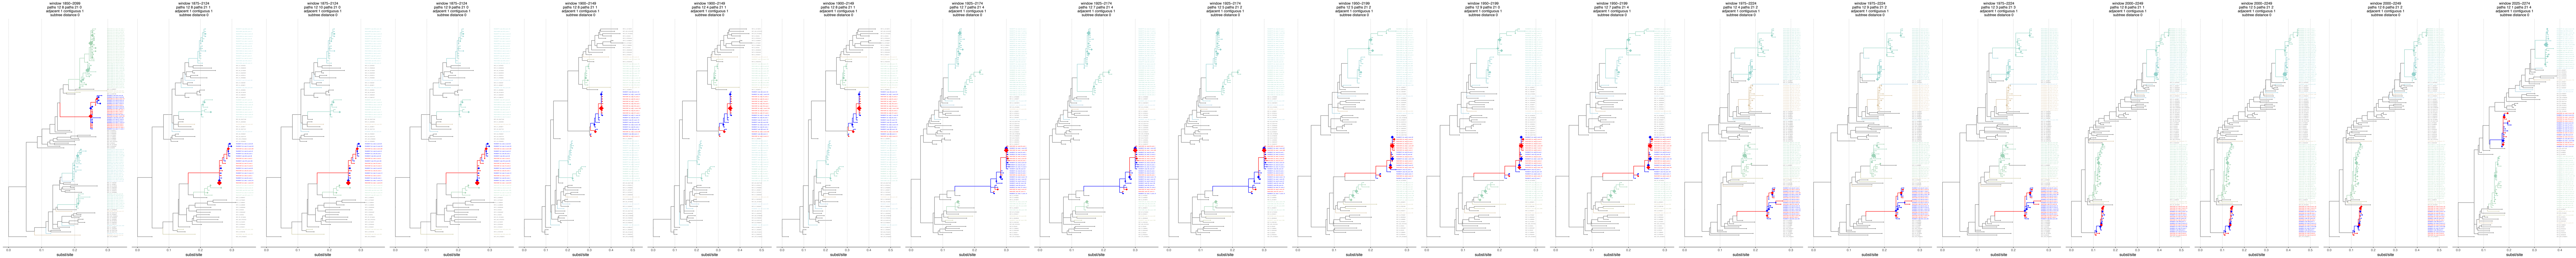

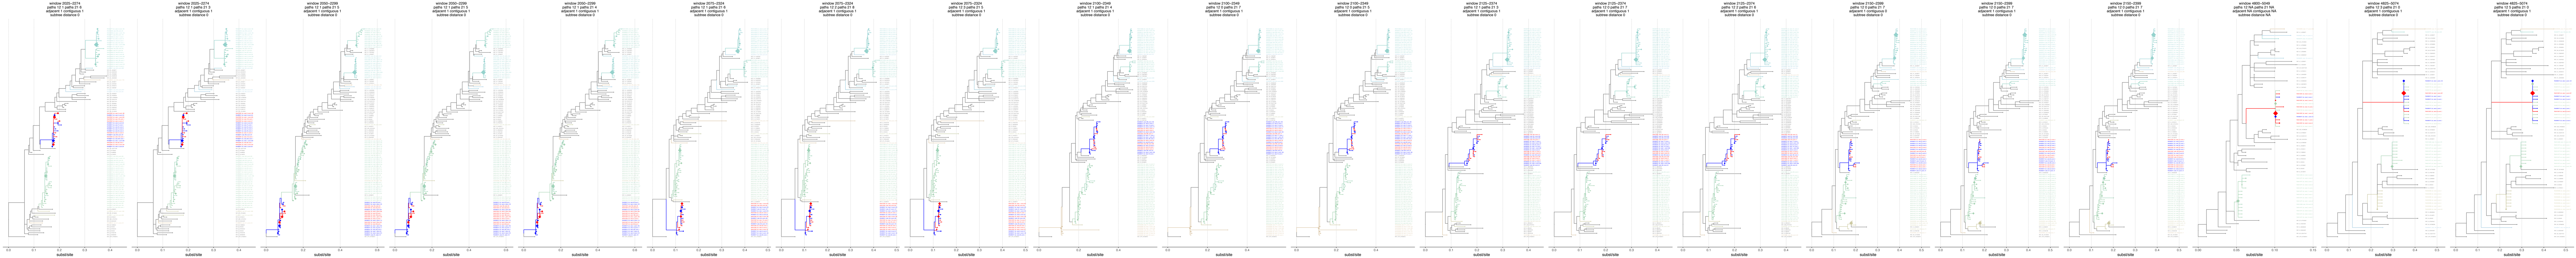

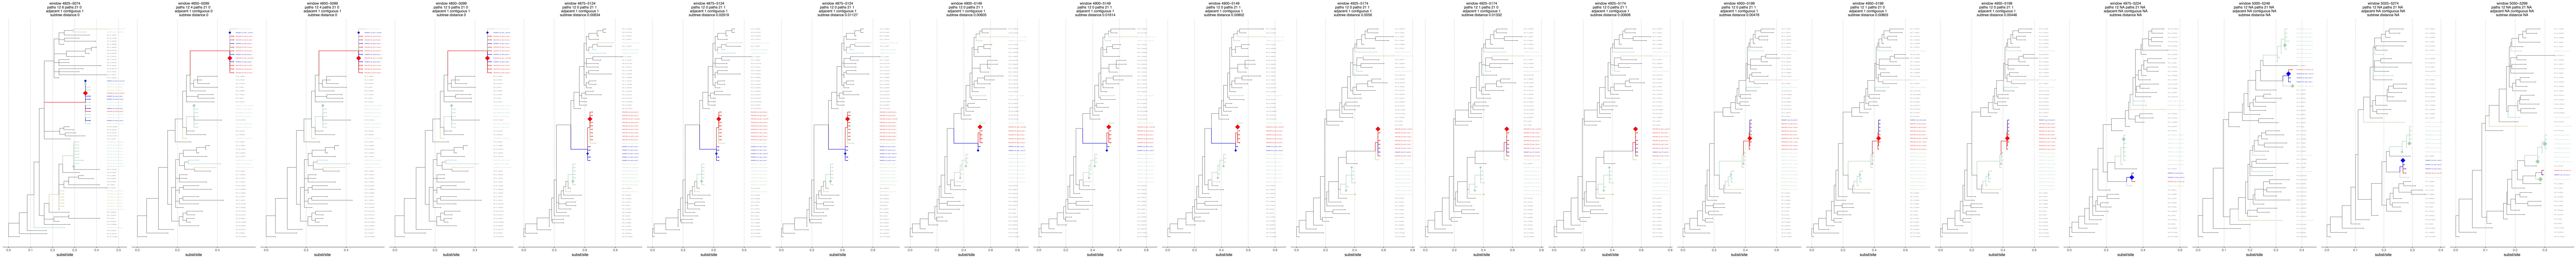

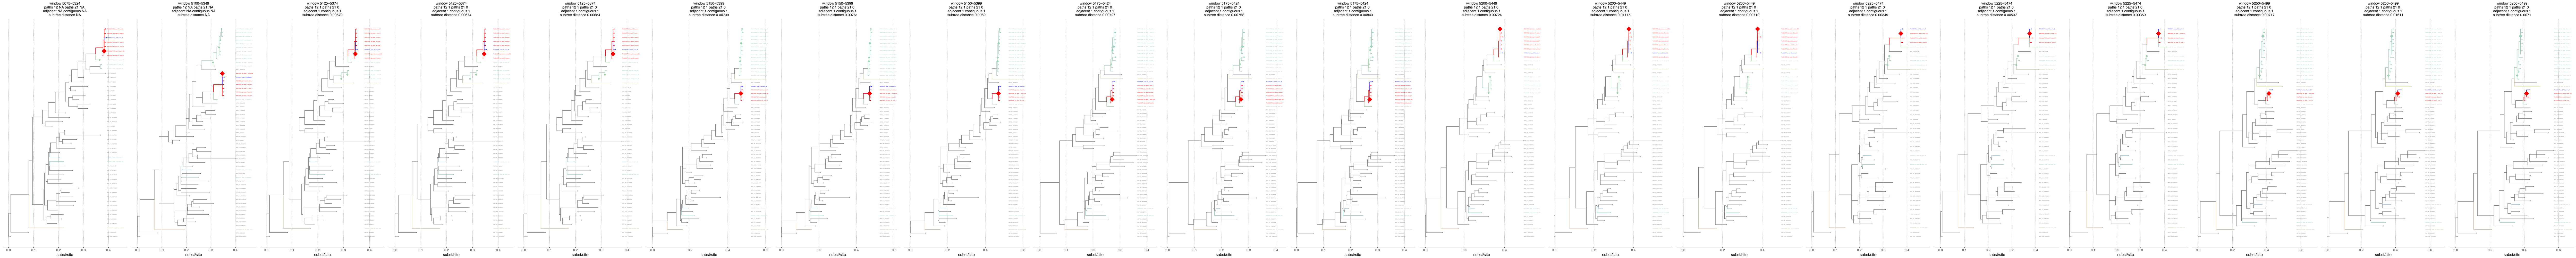

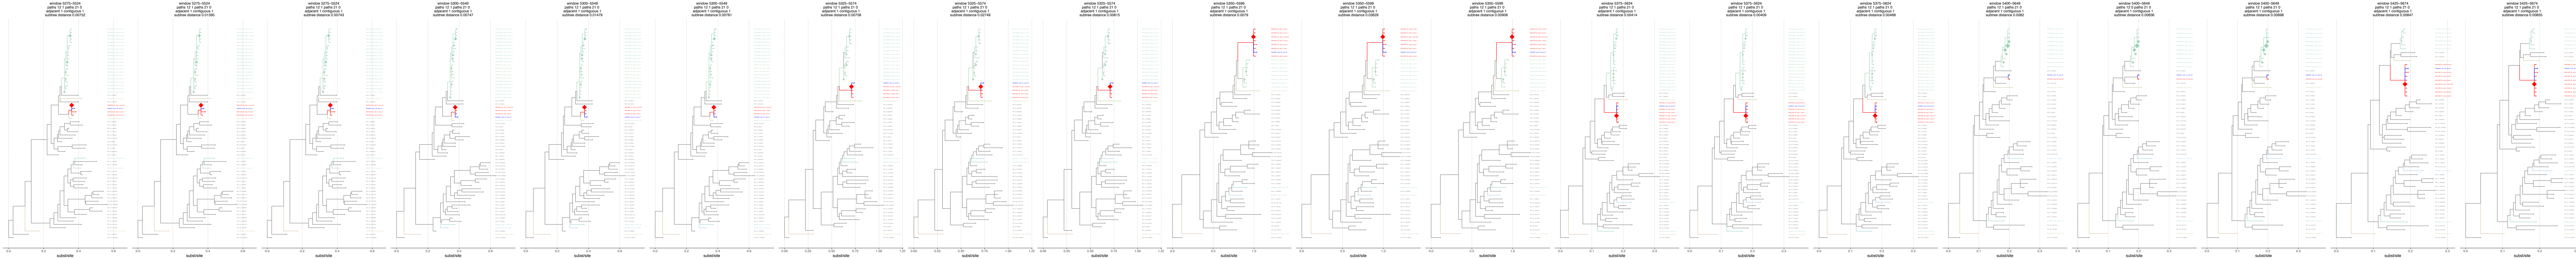

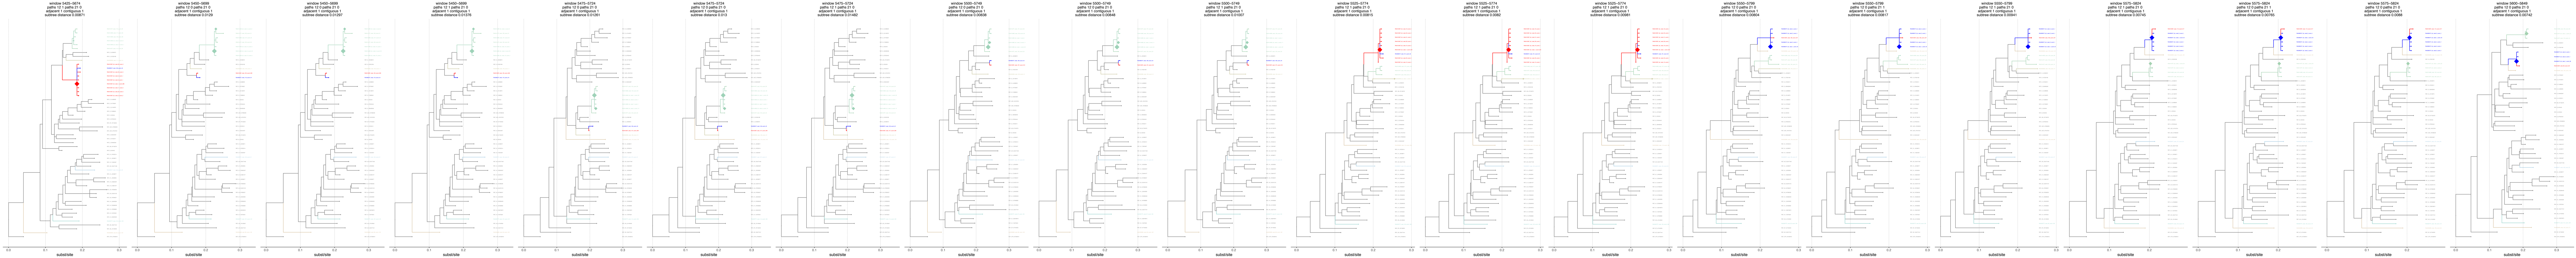

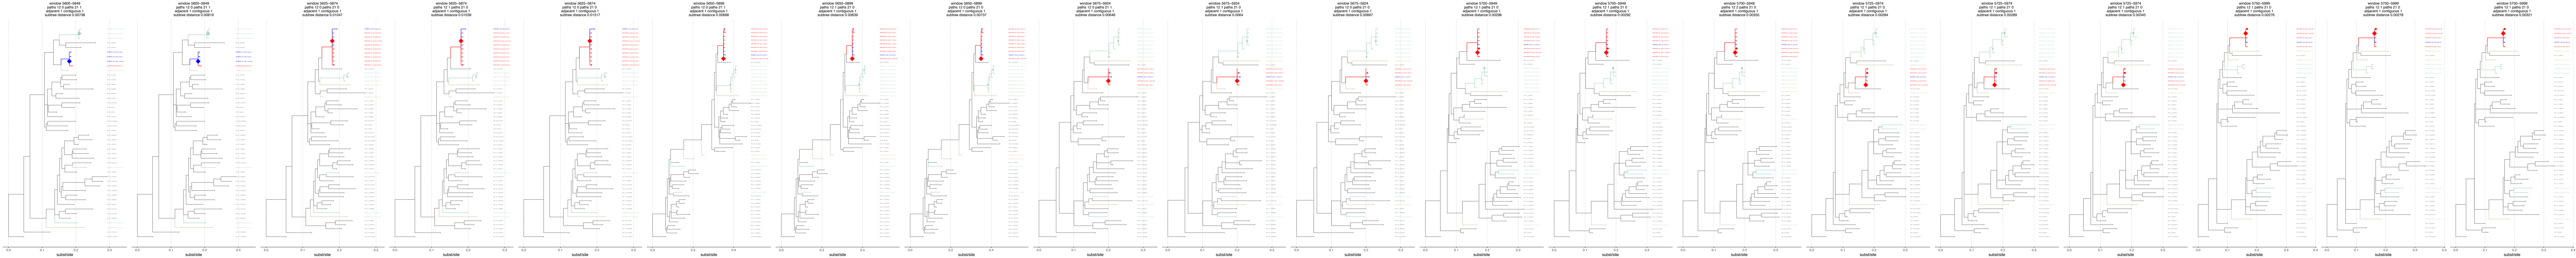

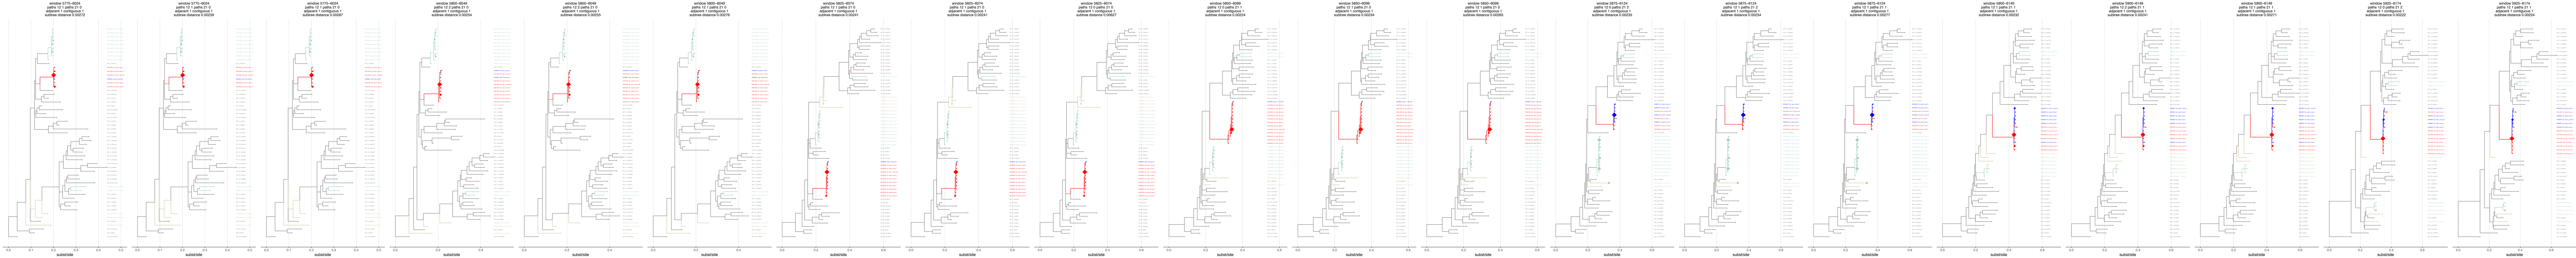

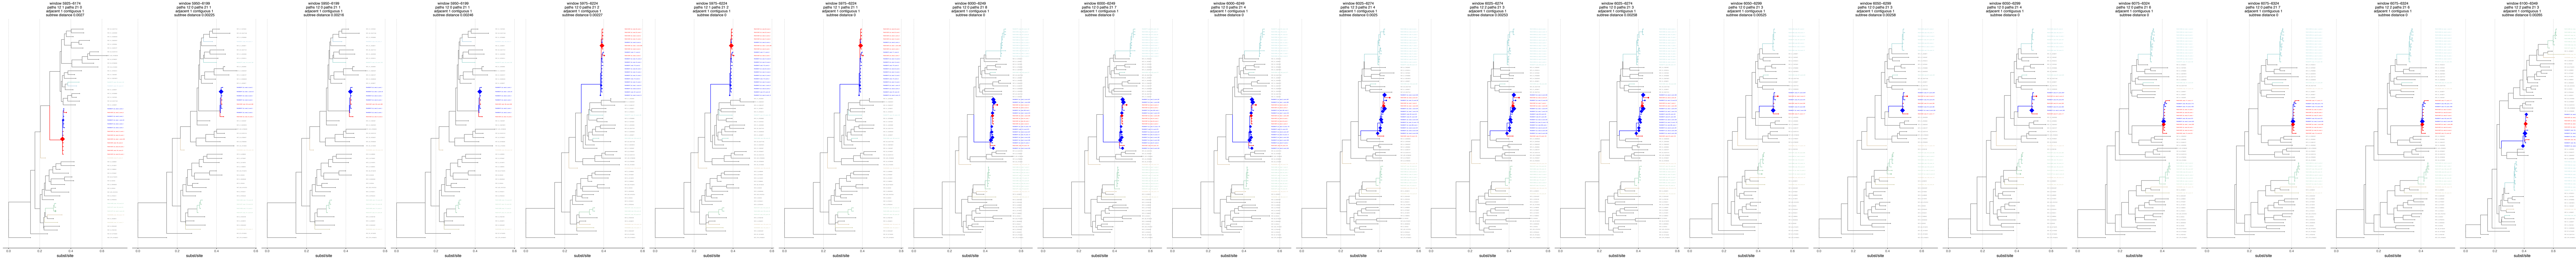

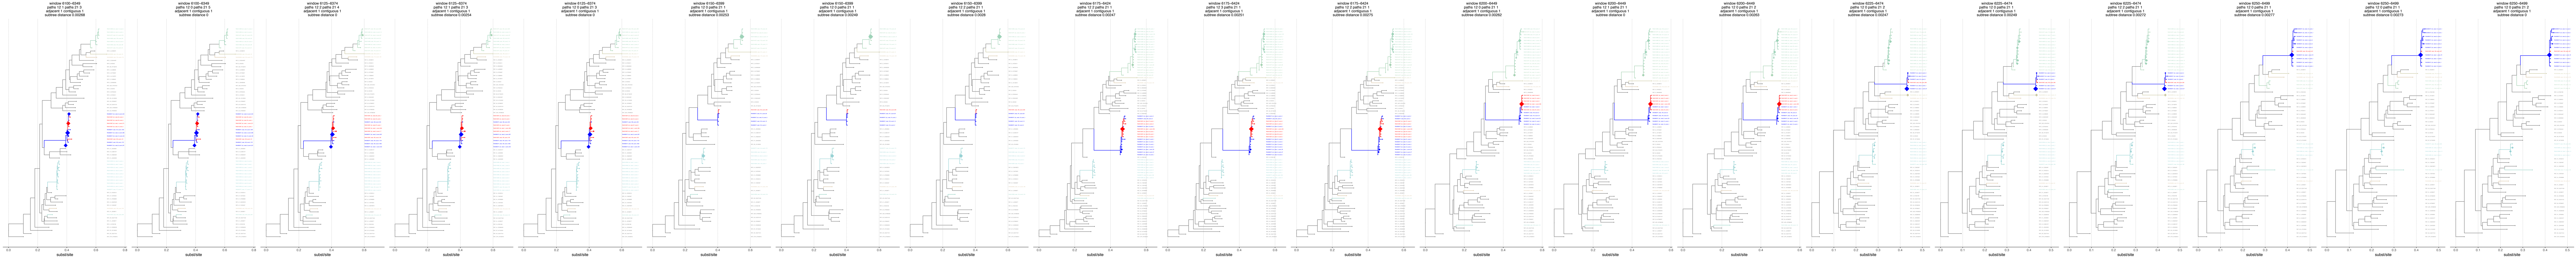

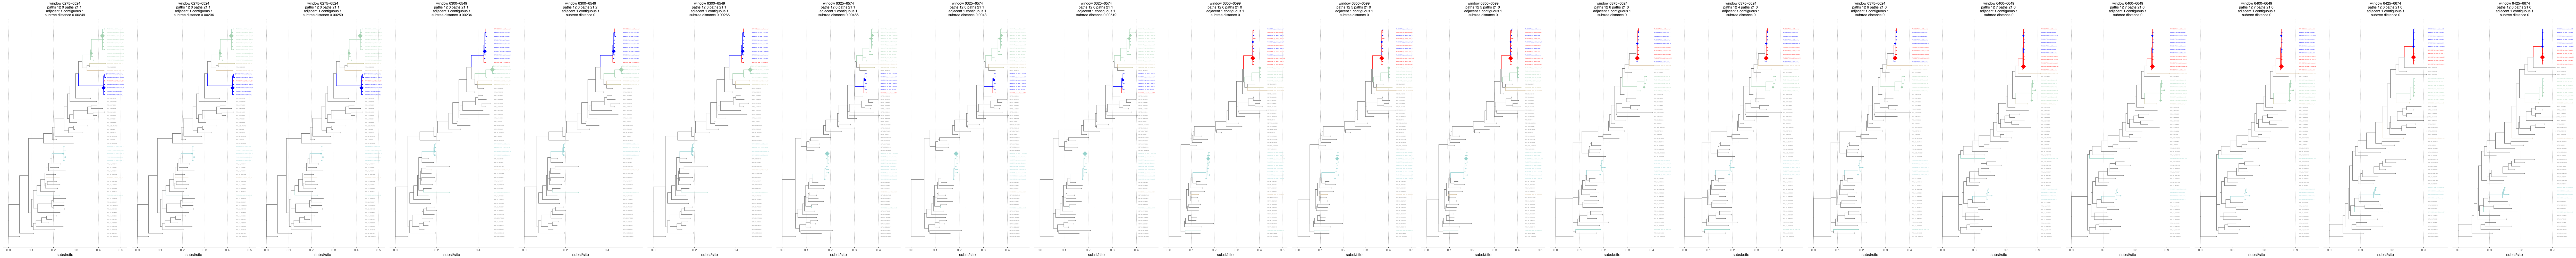

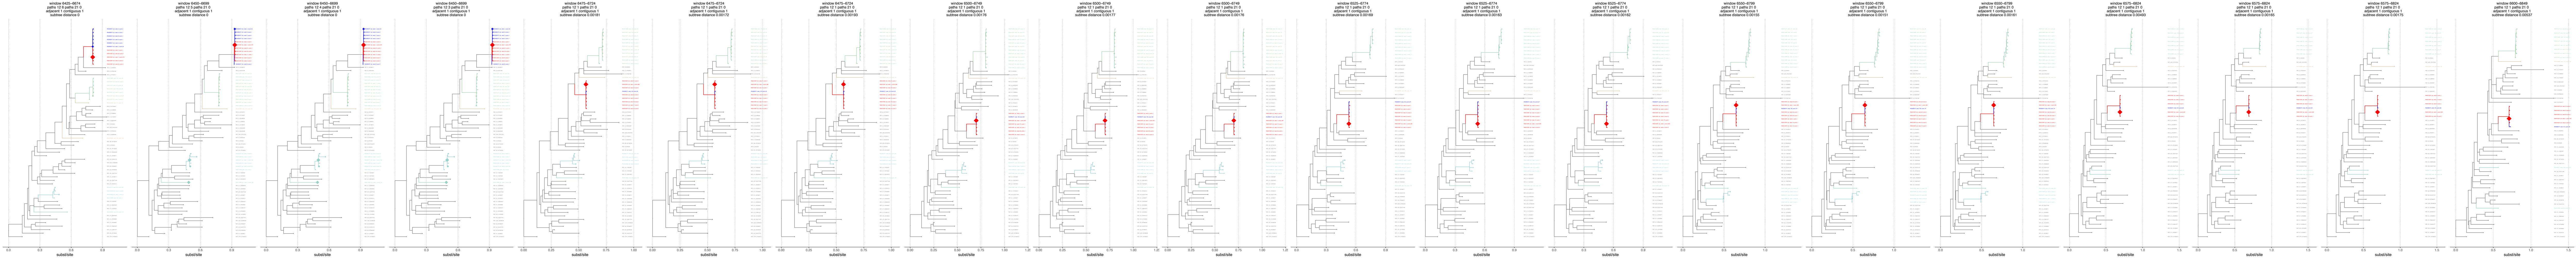

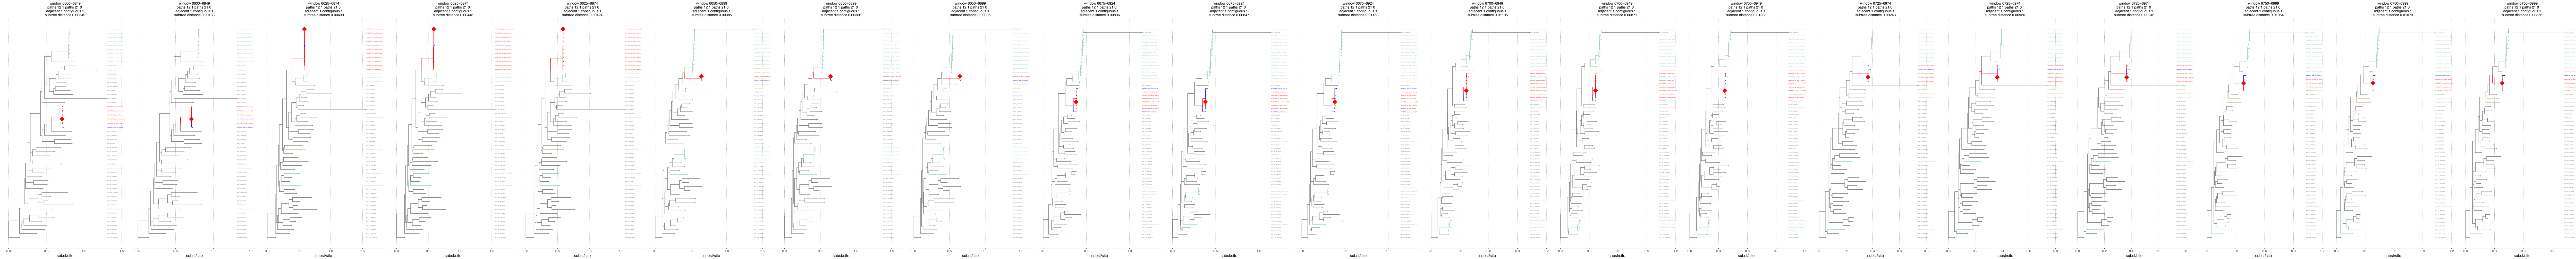

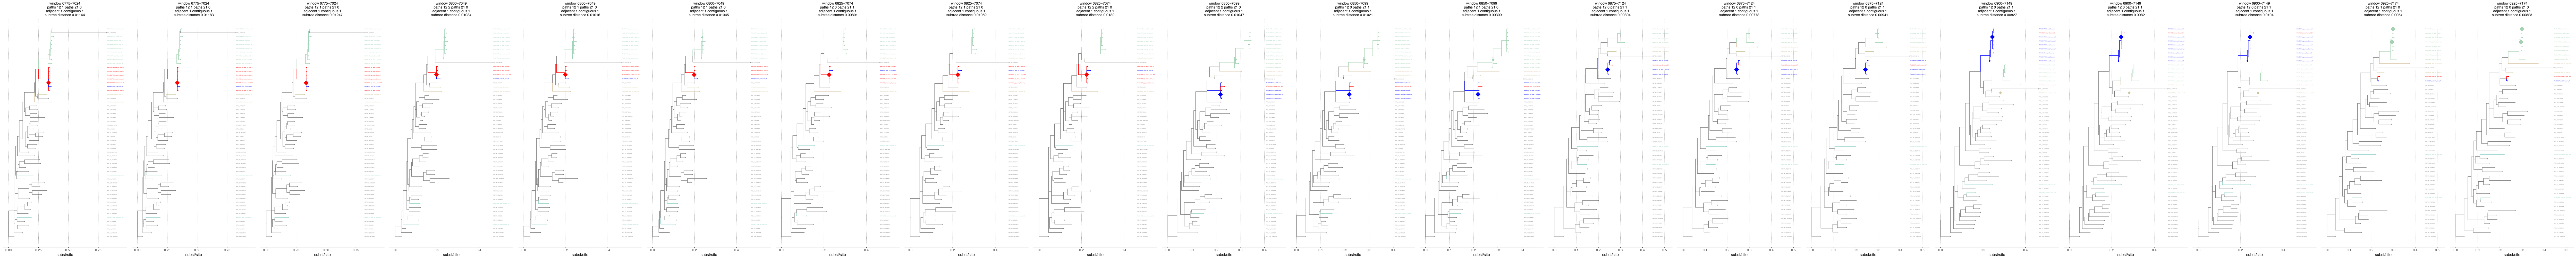

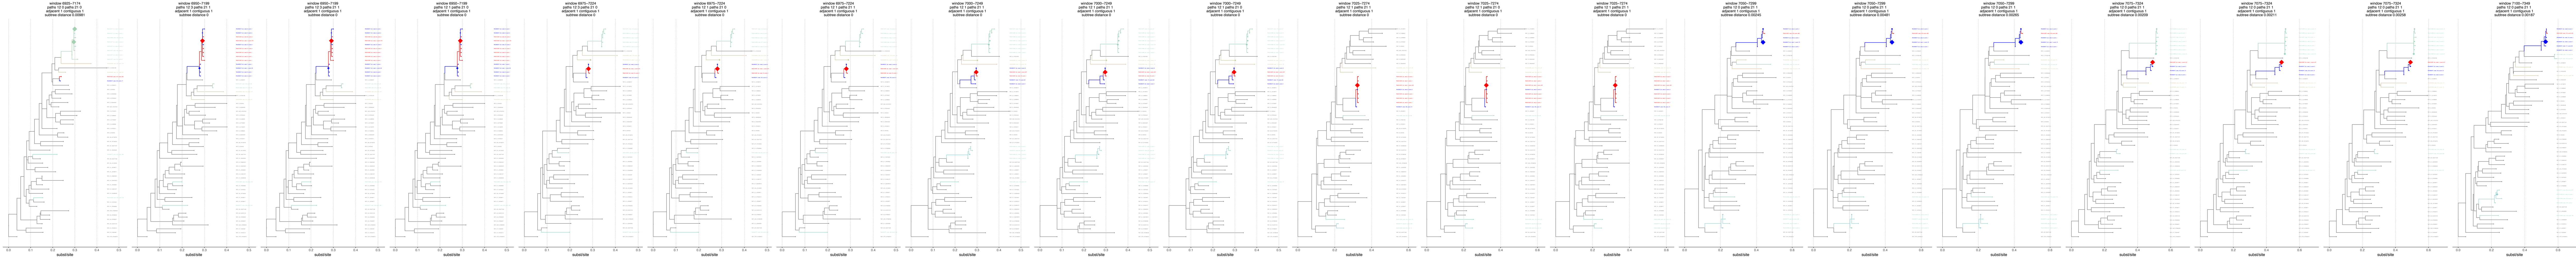

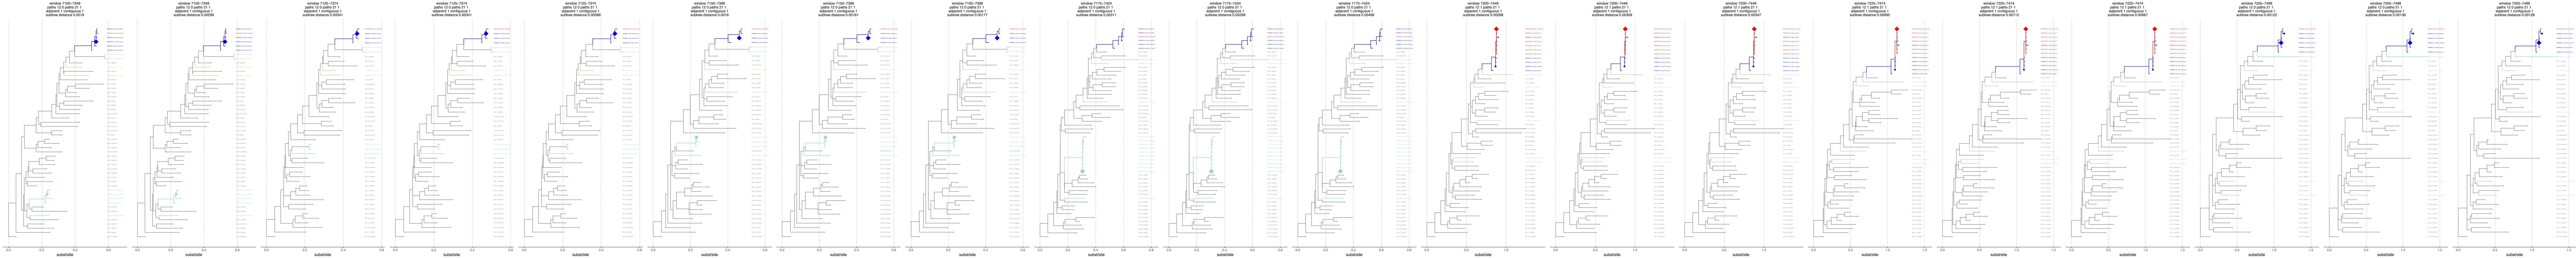

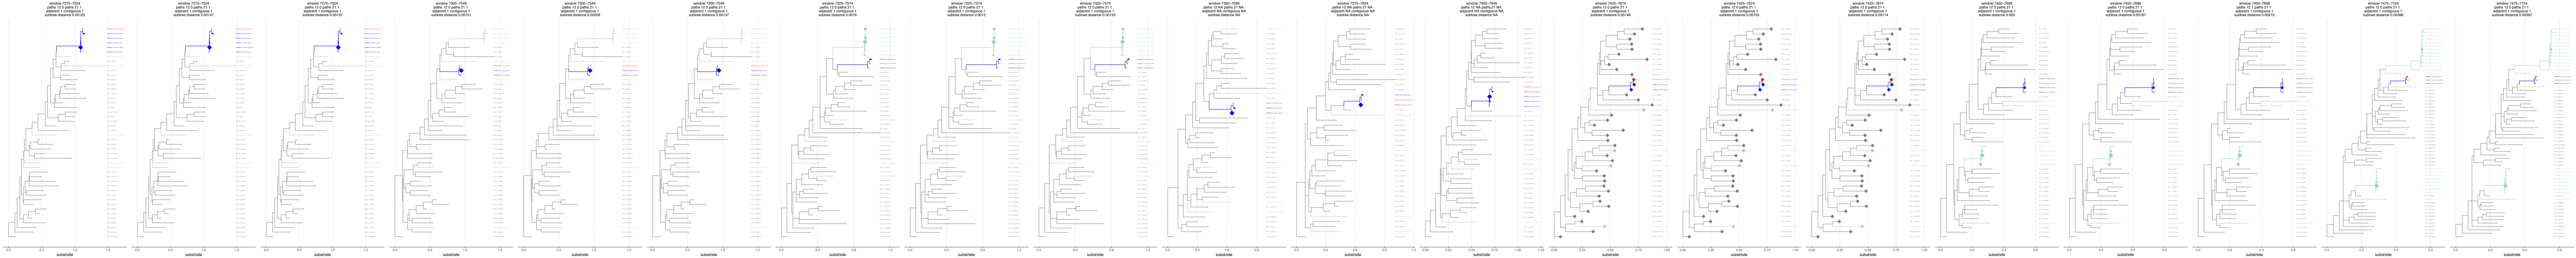

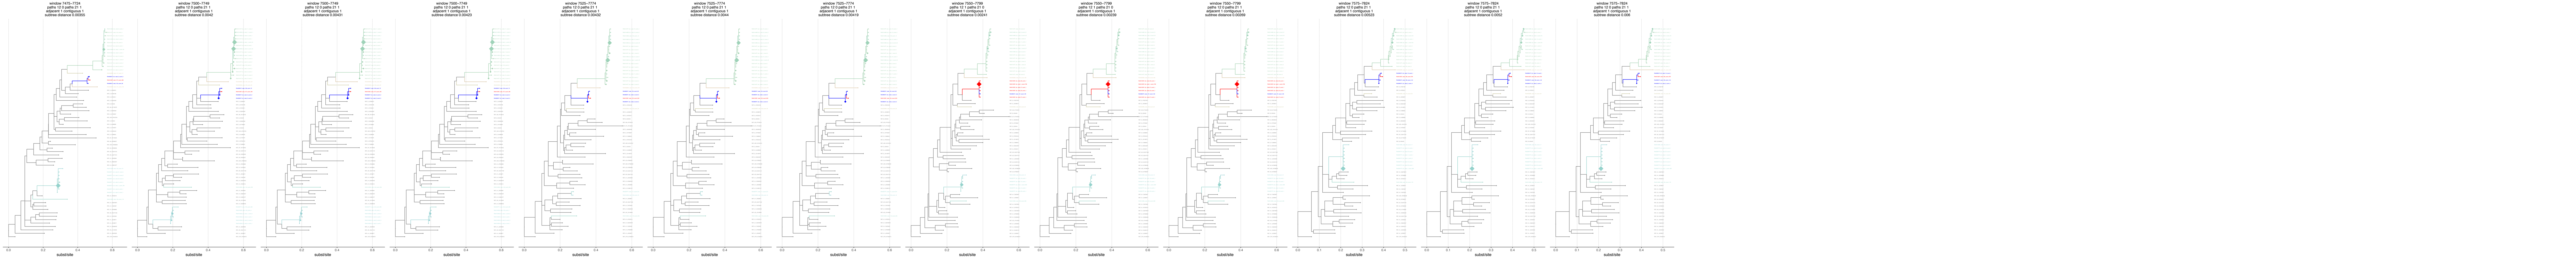

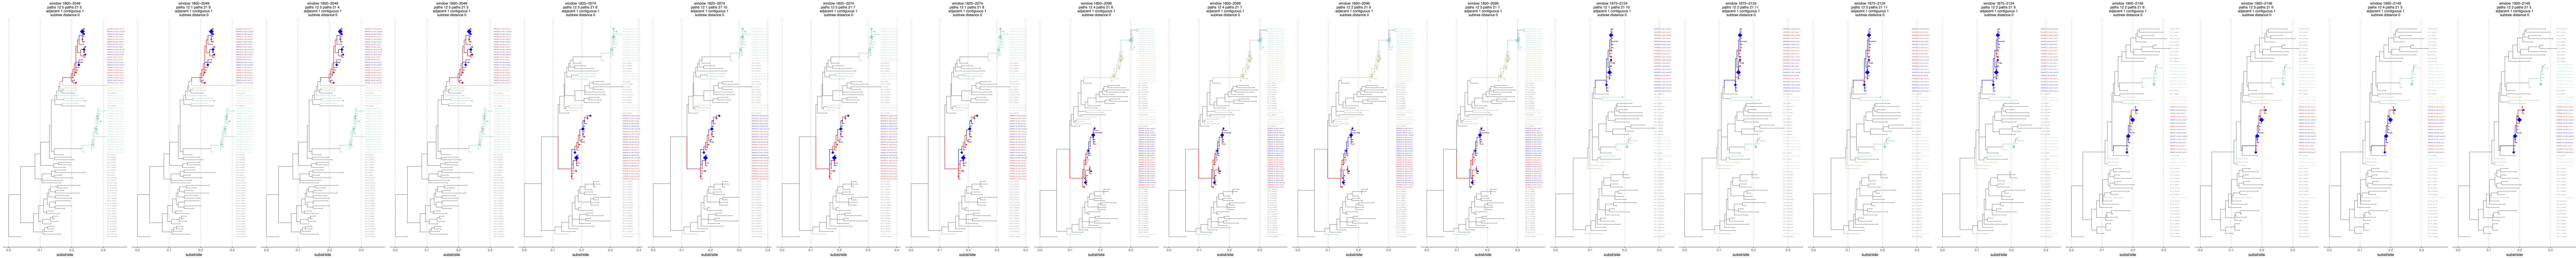

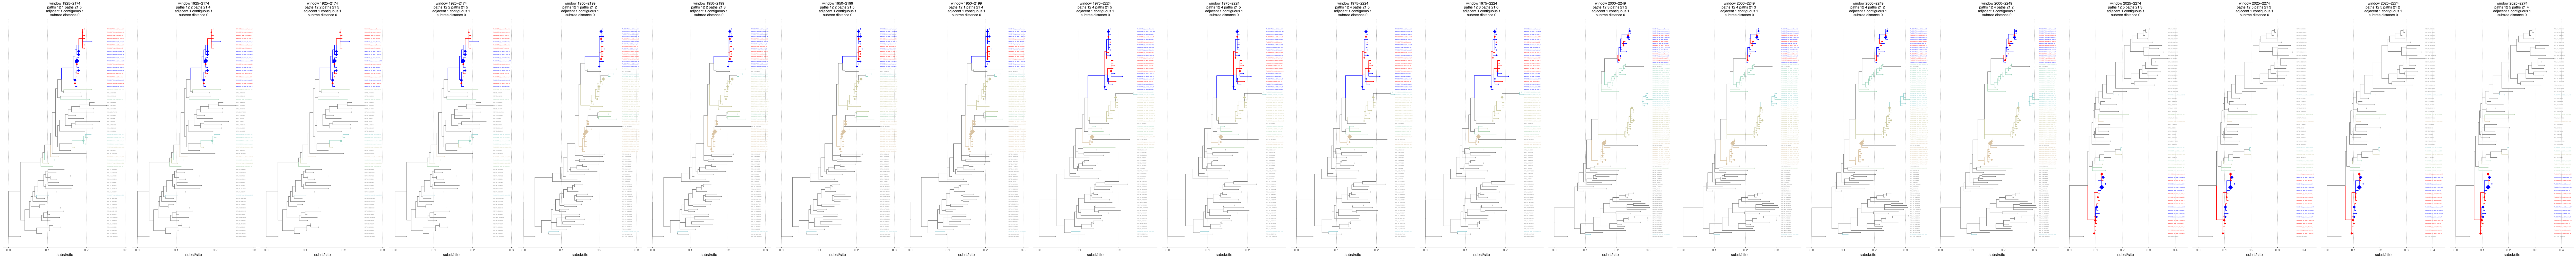

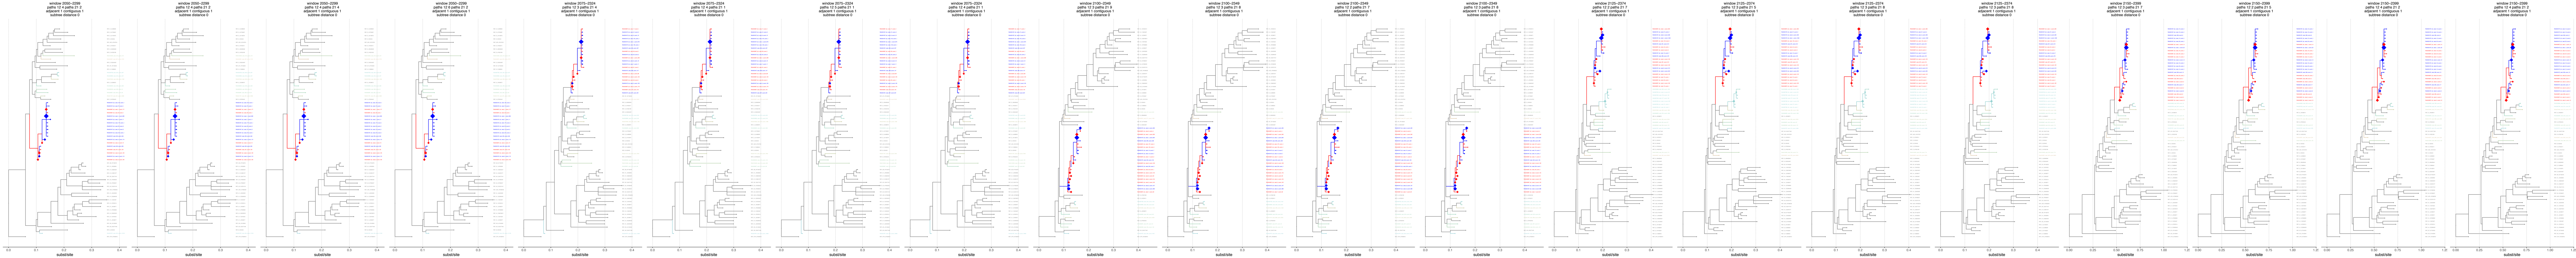

Supplement: Supplementary file 3 — Supplementary Data 1 [file 41467_2019_9139_MOESM3_ESM.pdf]
