# Supplementary material for: Inferring HIV-1 transmission networks and sources of epidemic spread in Africa with deep-sequence phylogenetic analysis
Source: Nat Commun. 2019 Mar 29;10:1411. doi: 10.1038/s41467-019-09139-4 (PMC6441045; doi:10.1038/s41467-019-09139-4)

Deep sequence phylogenies  
of male-female pair RkA05162M, RkA02020F (run 10)  
for whom the phylogenetically inferred direction of transmission was inconsistent with clinical data.

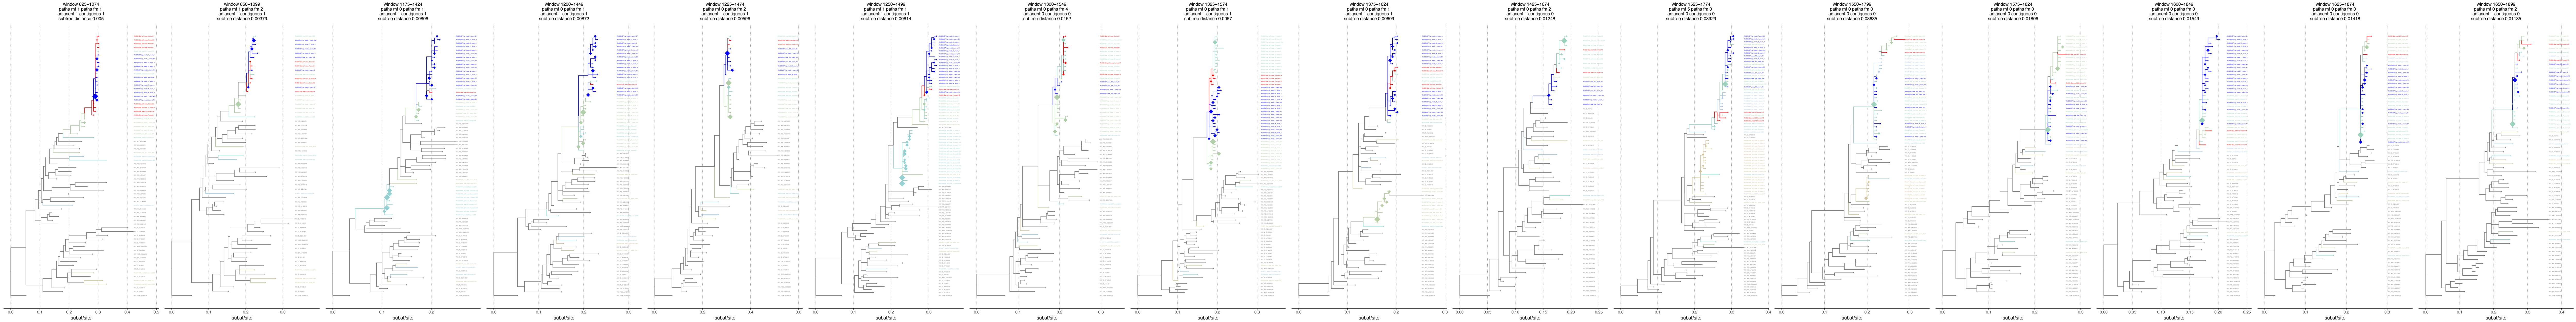

Deep sequence phylogenies  
of male-female pair RkA00495M, RkA07422F (run 12)  
for whom the phylogenetically inferred direction of transmission was inconsistent with clinical data.

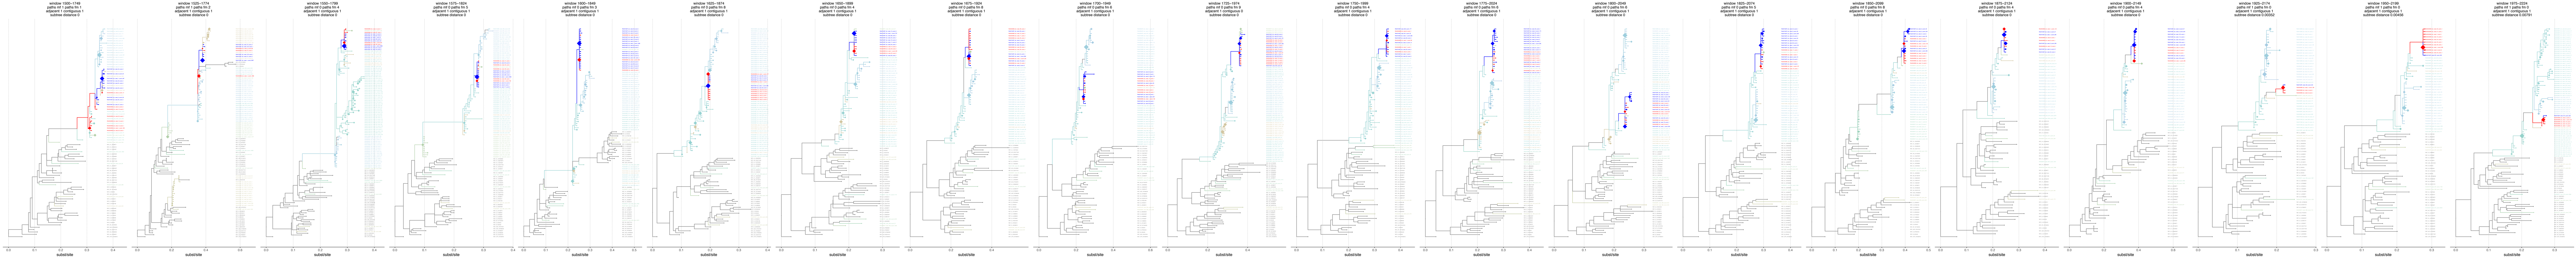

window 2000-2249  
paths m1 1 paths fm 0  
adjacent 1 contiguous 1  
subtree distance 0.00945

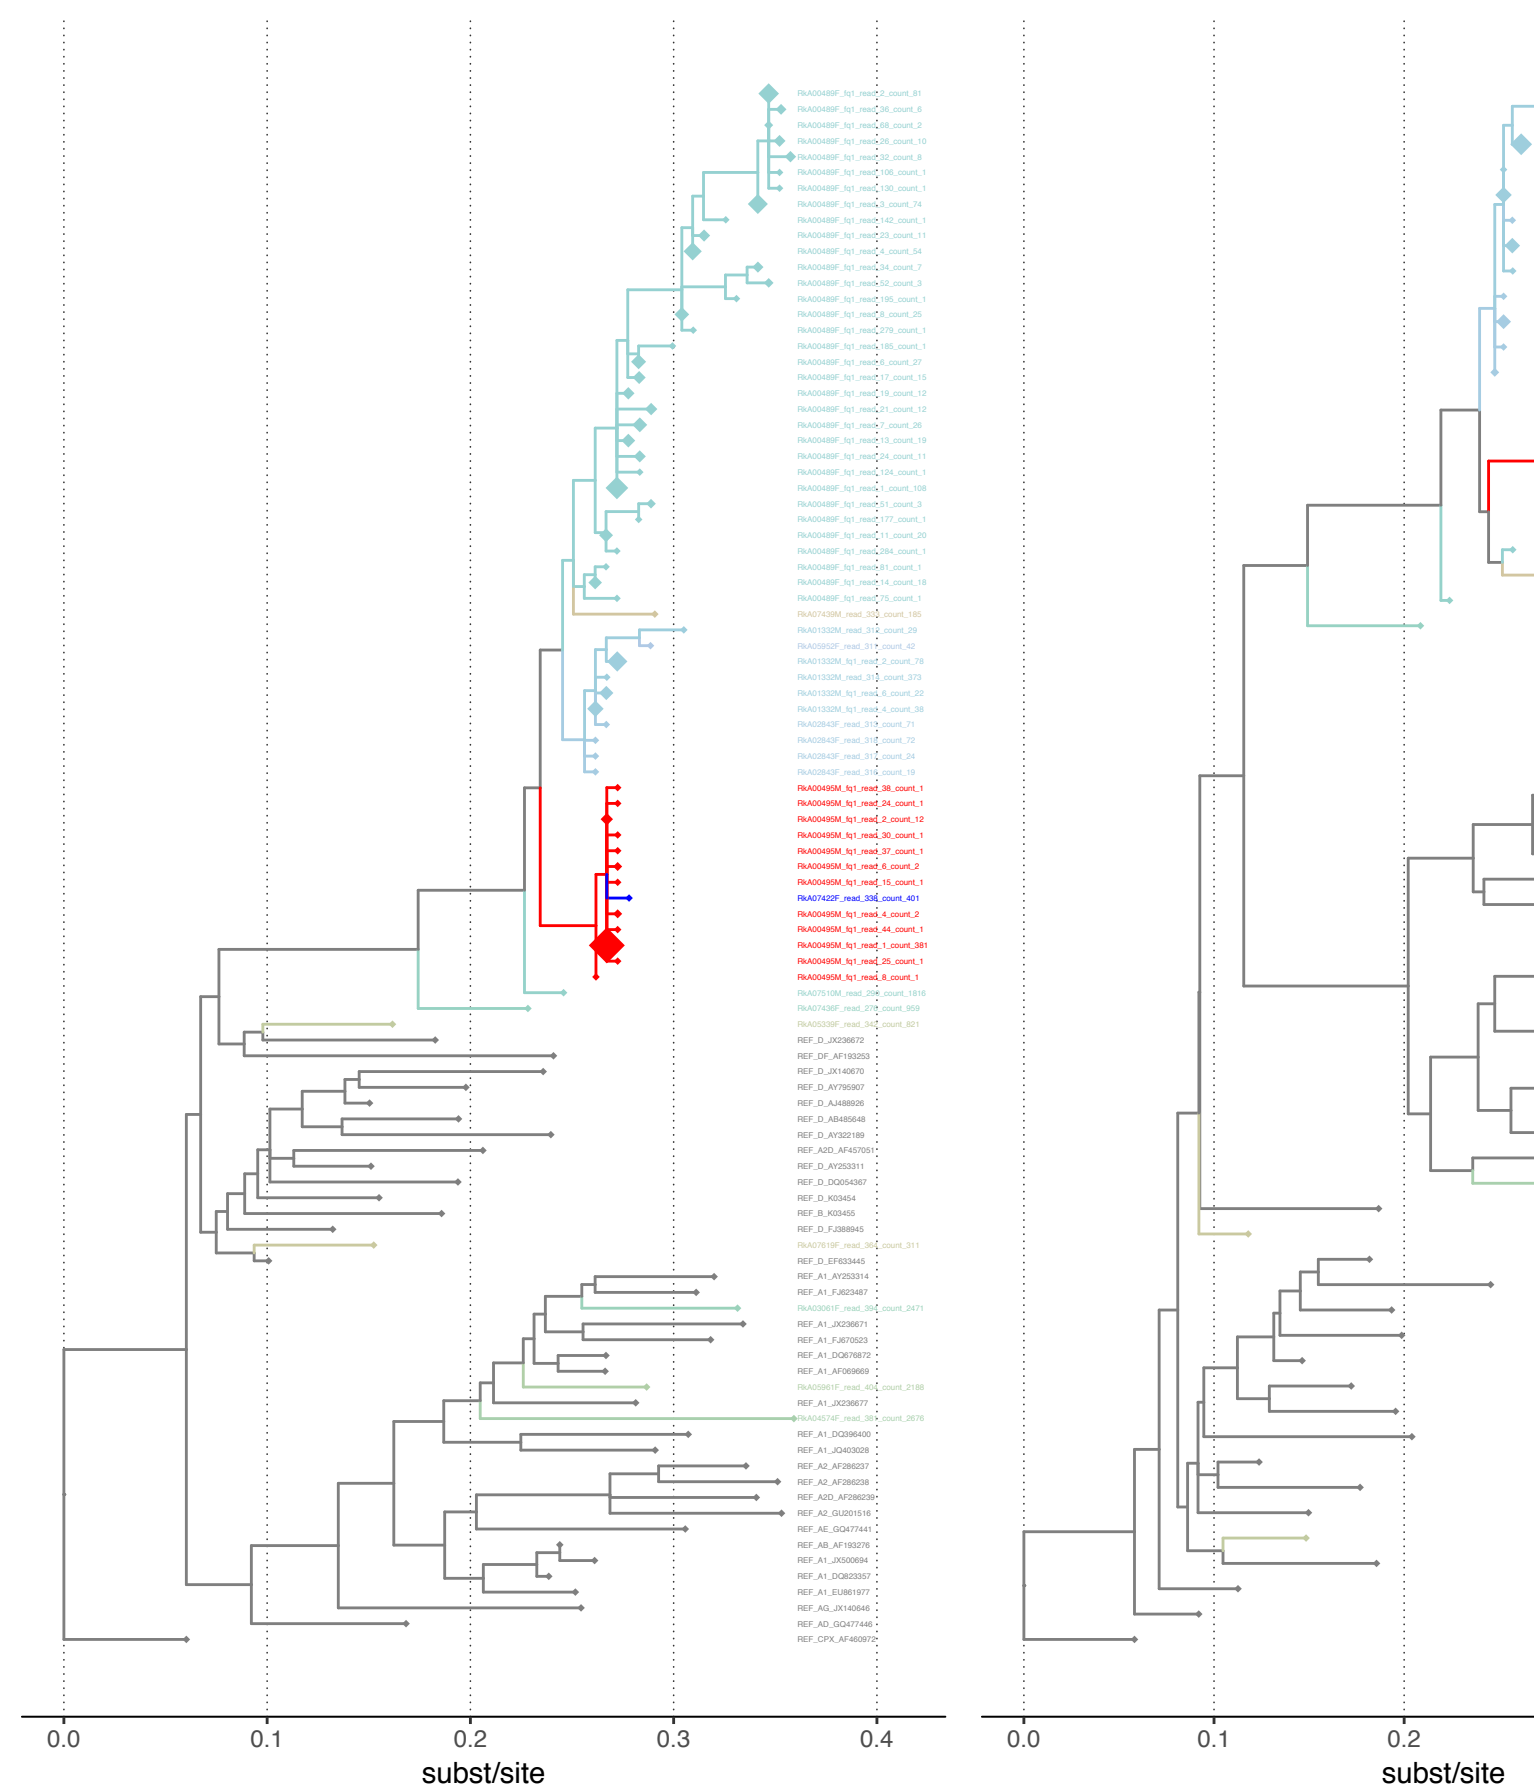

window 2025-2274  
paths m1 1 paths fm 0  
adjacent 1 contiguous 1  
subtree distance 0.00834

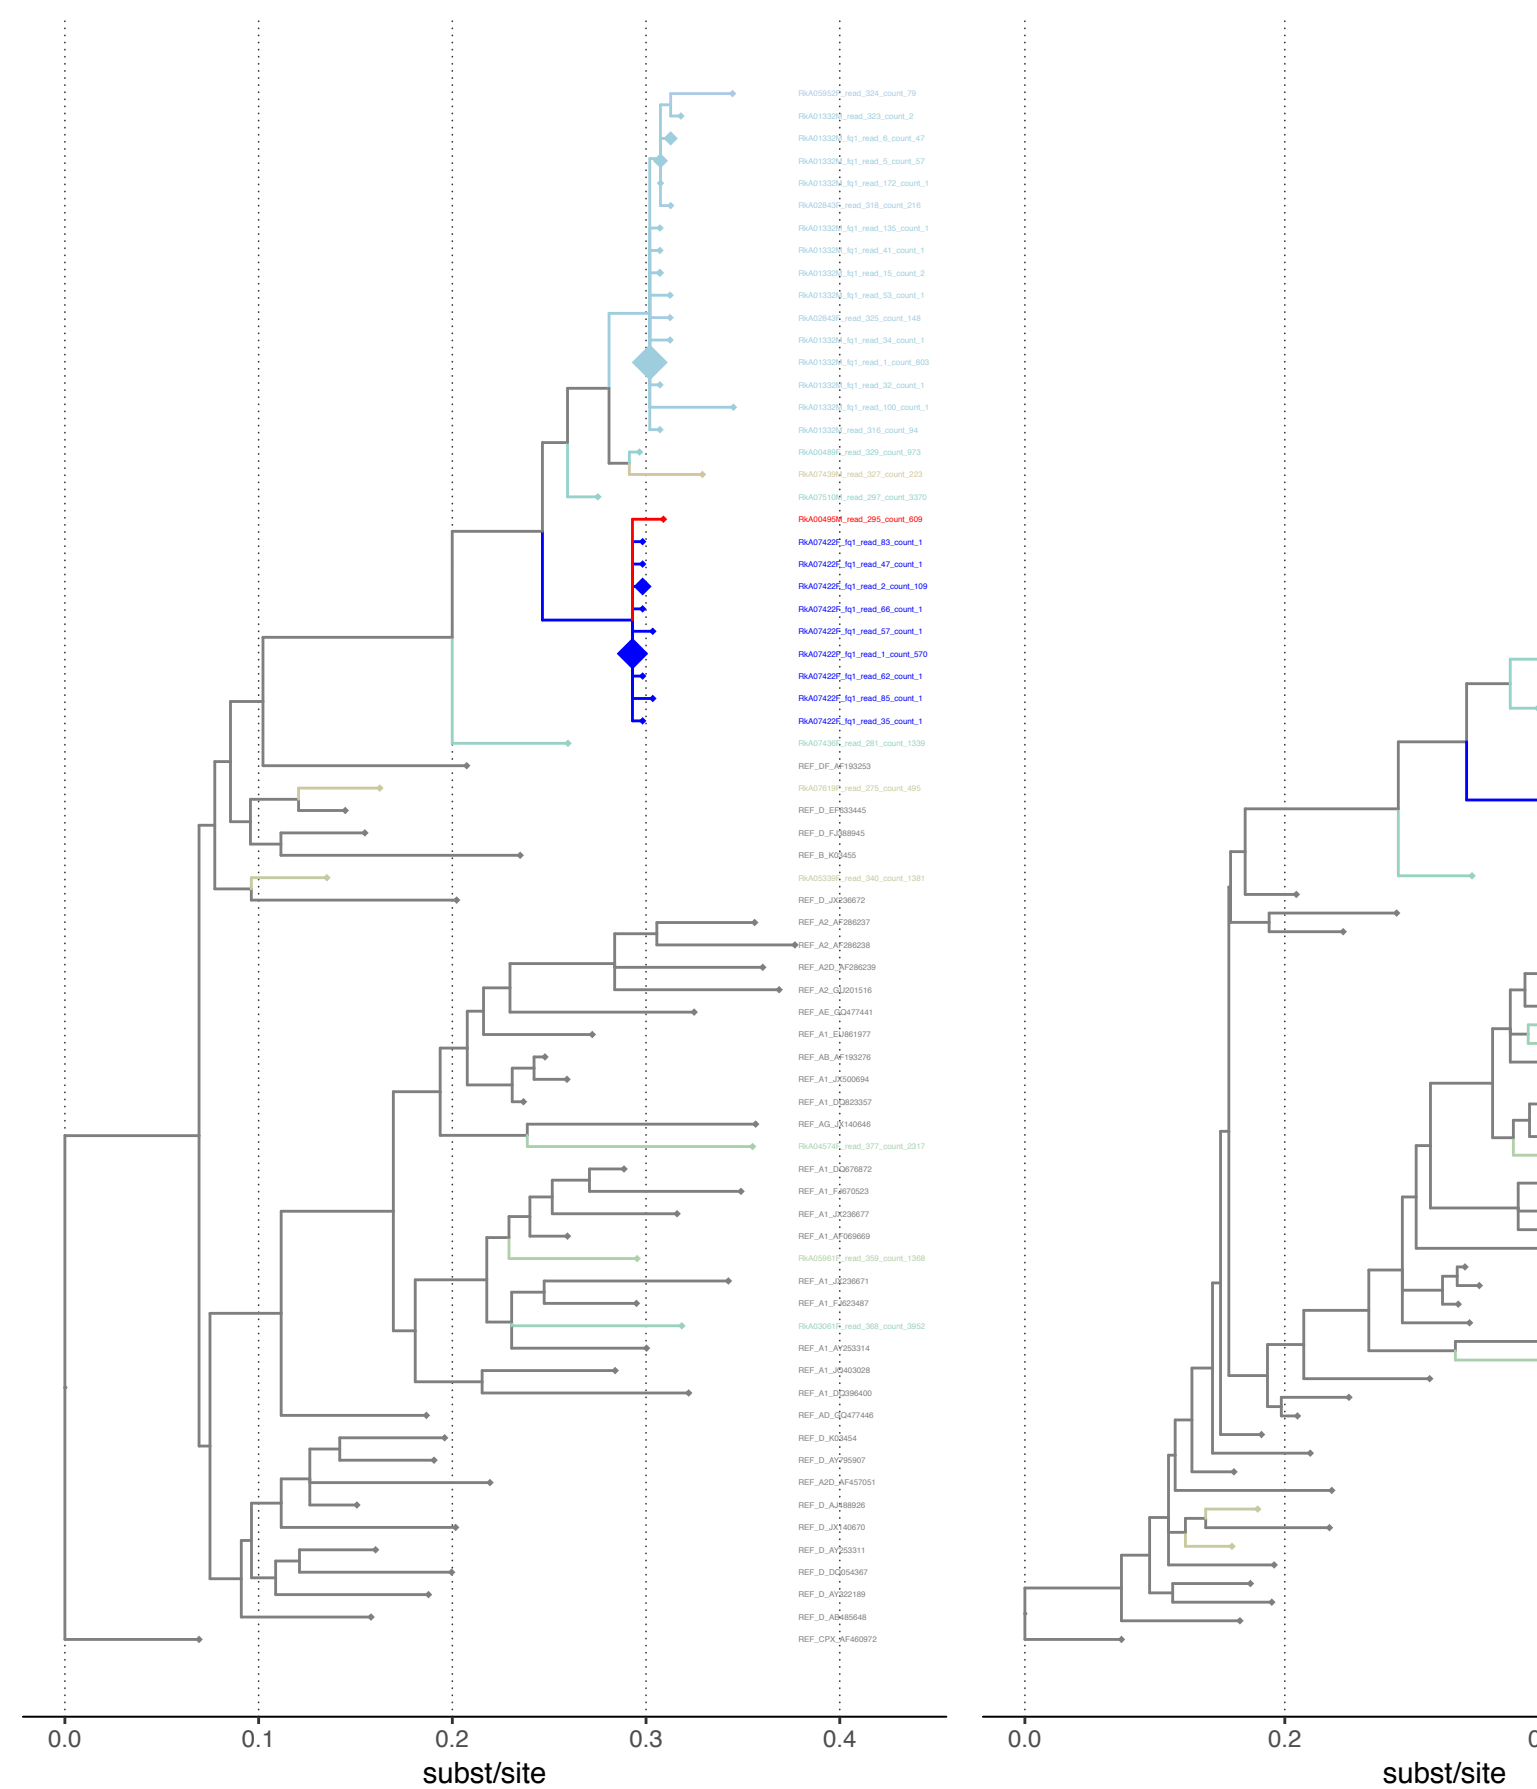

window 2050-2299  
paths m1 0 paths fm 1  
adjacent 1 contiguous 1  
subtree distance 0.01424

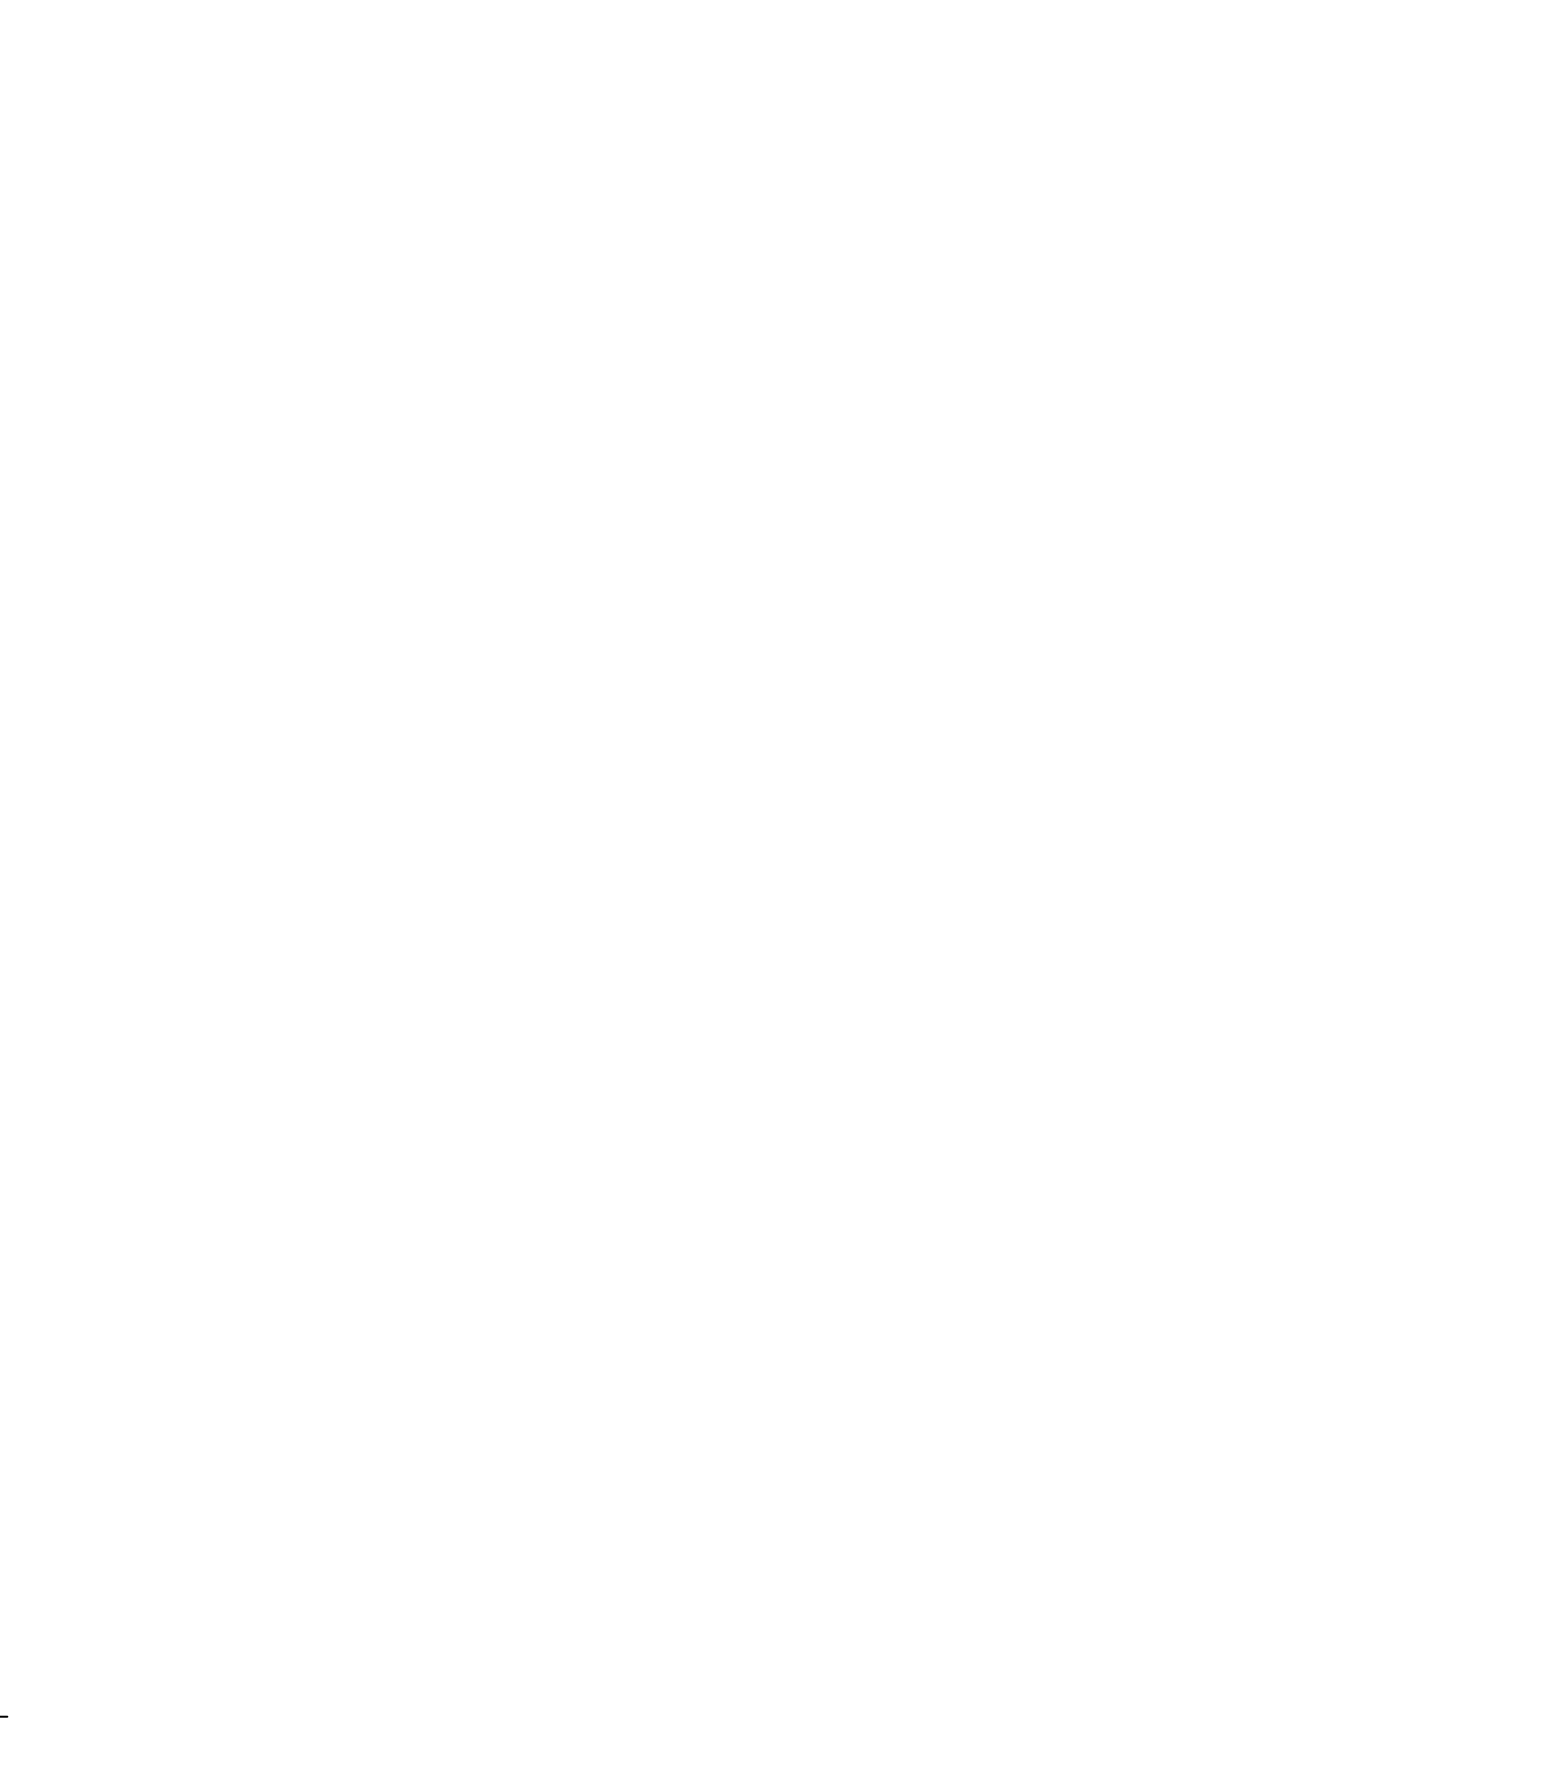

window 2075-2324  
paths m1 0 paths fm 1  
adjacent 1 contiguous 1  
subtree distance 0.01437

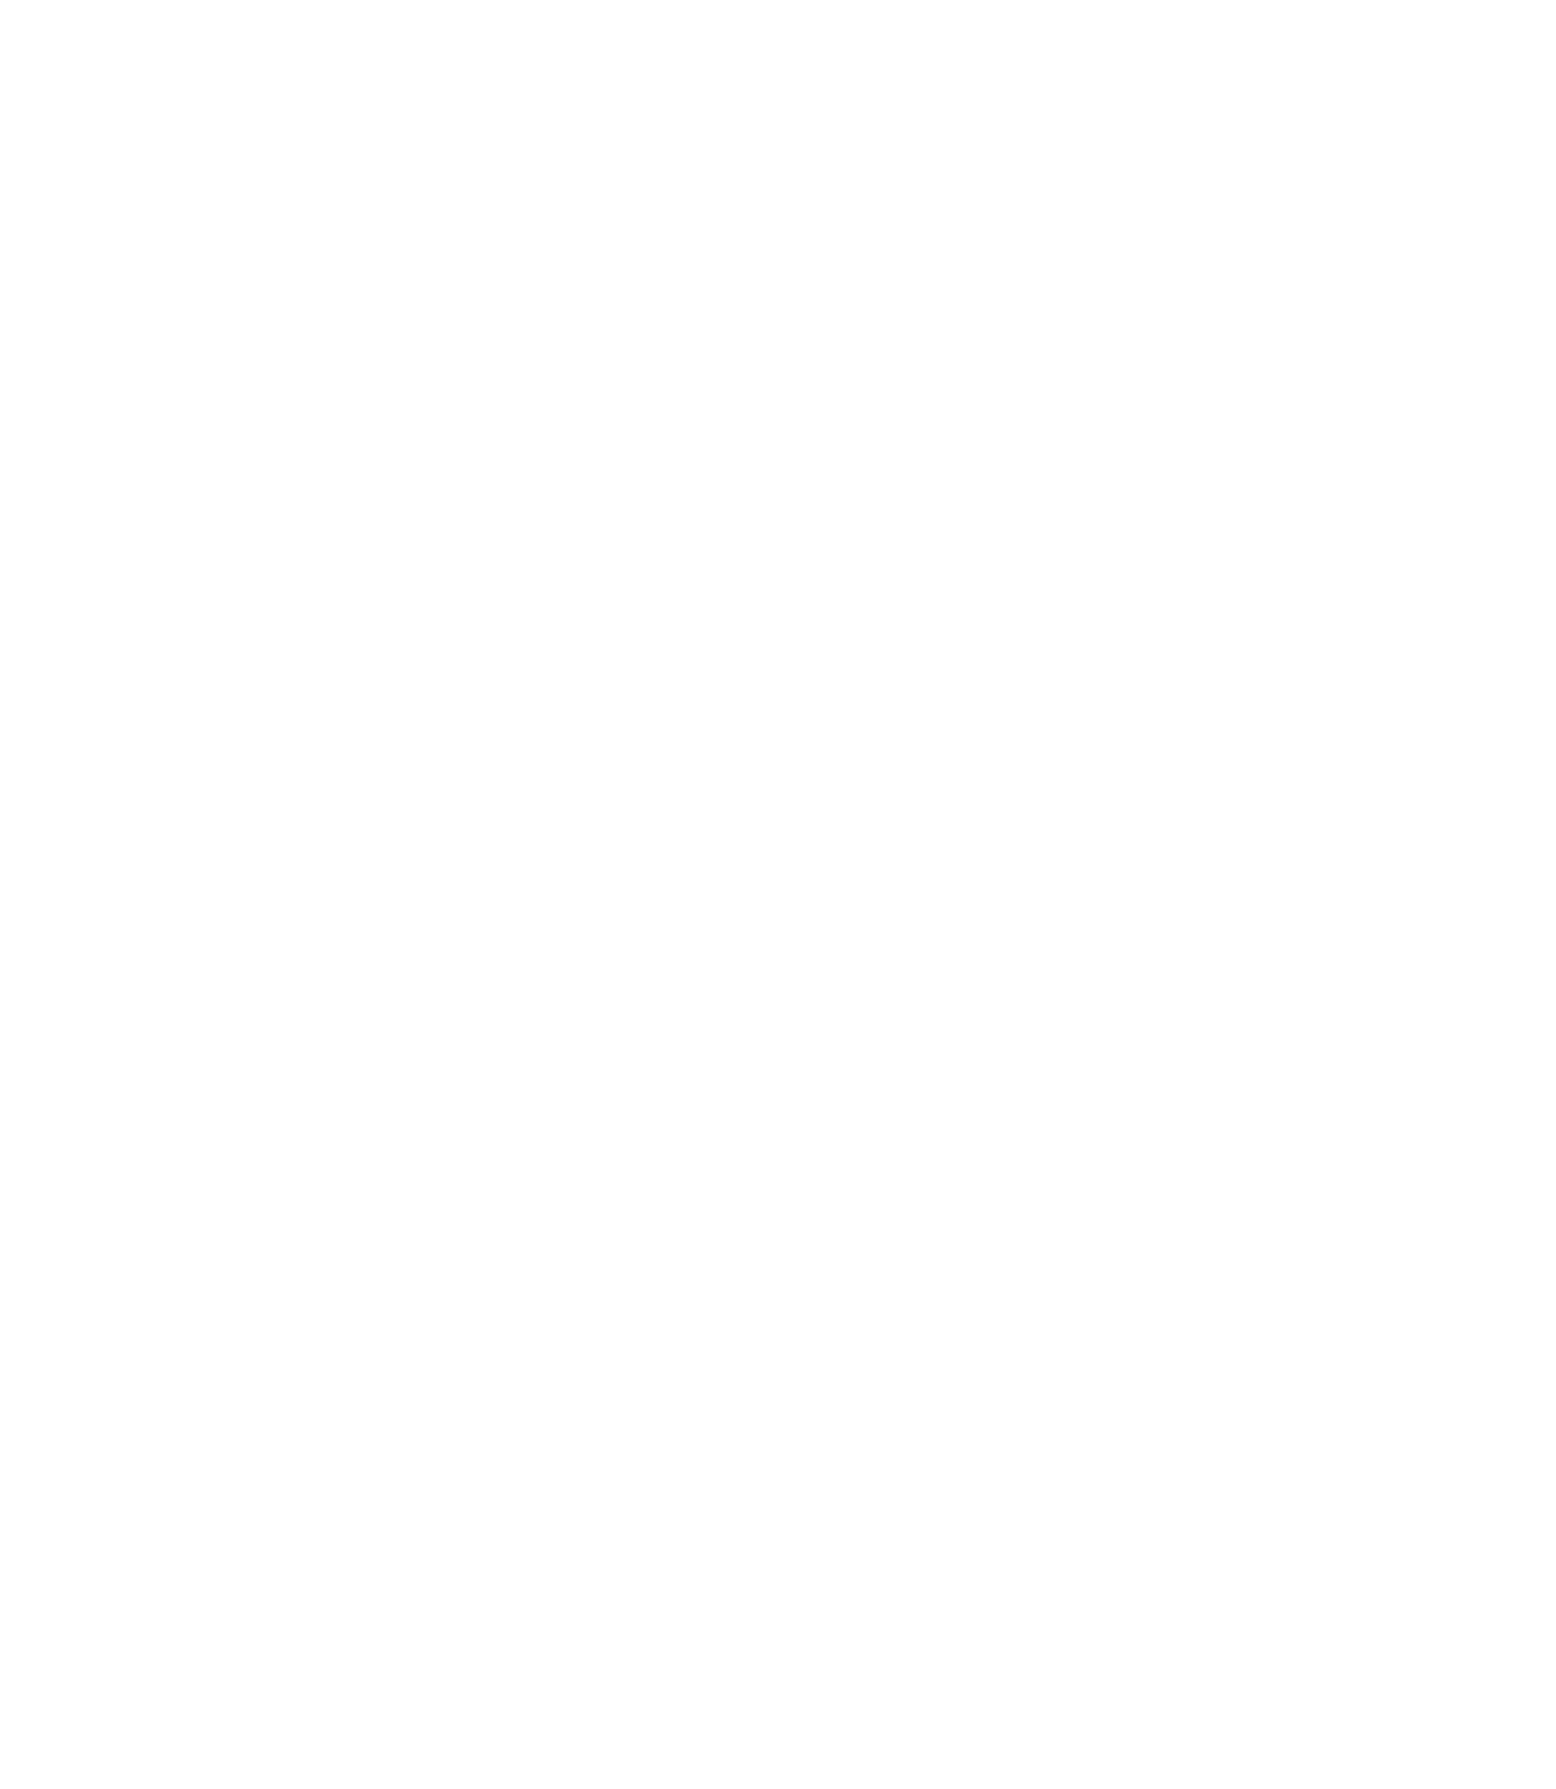

Deep sequence phylogenies  
of male-female pair RkA02808M, RkA00505F (run 17)  
for whom the phylogenetically inferred direction of transmission was inconsistent with clinical data.

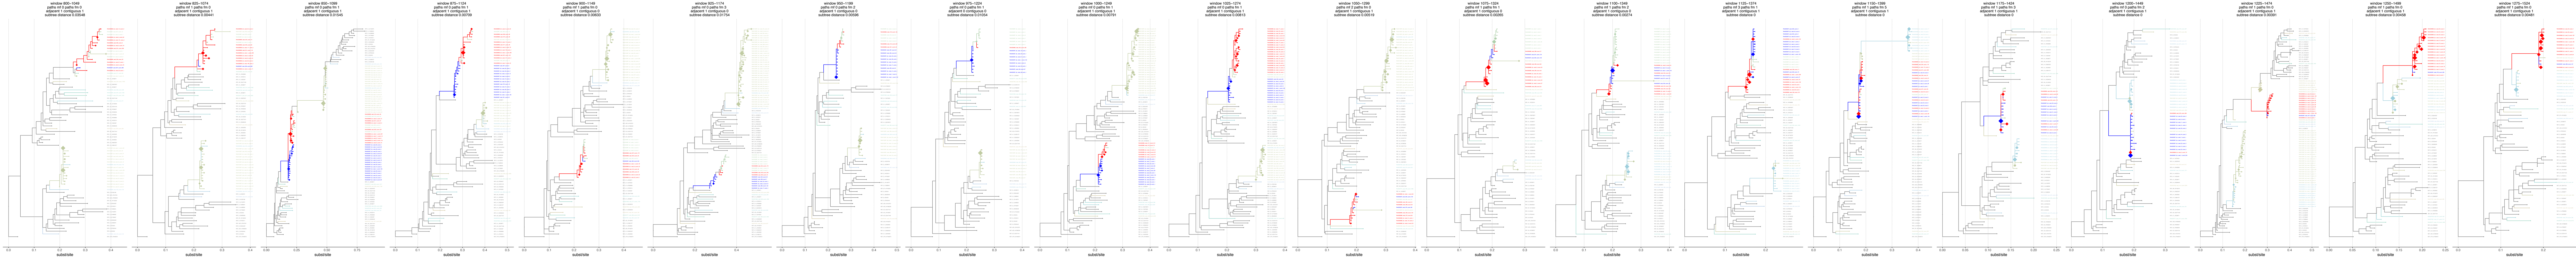

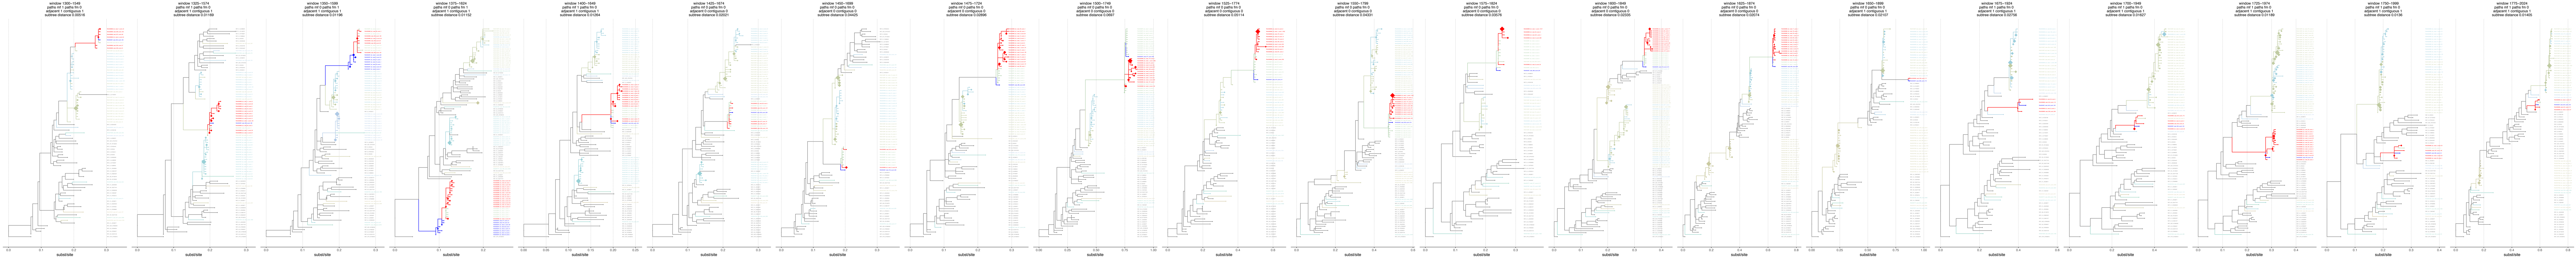

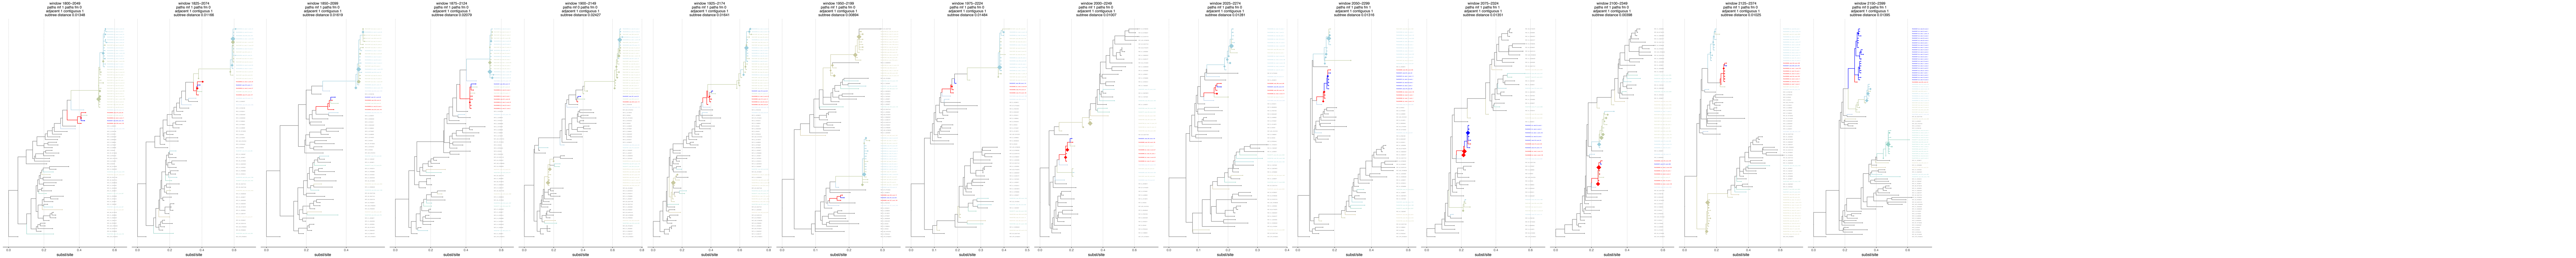

Deep sequence phylogenies  
of male-female pair RkA06493M, RkA00425F (run 34)  
for whom the phylogenetically inferred direction of transmission was inconsistent with clinical data.

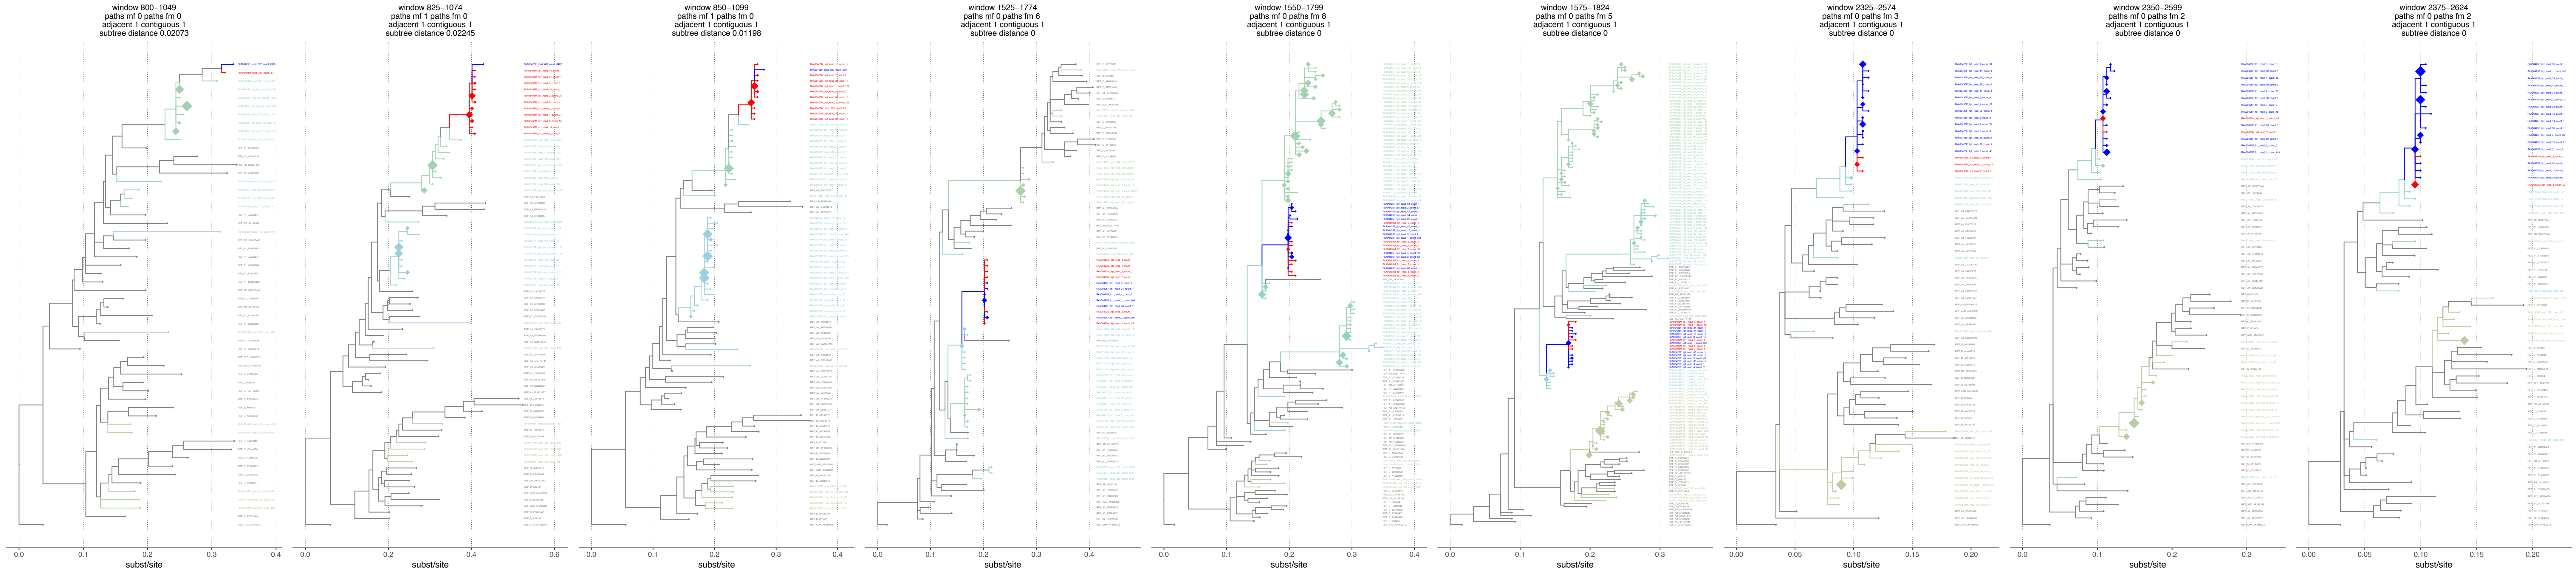

Deep sequence phylogenies  
of male-female pair RkA02803M, RkA00868F (run 42)  
for whom the phylogenetically inferred direction of transmission was inconsistent with clinical data.

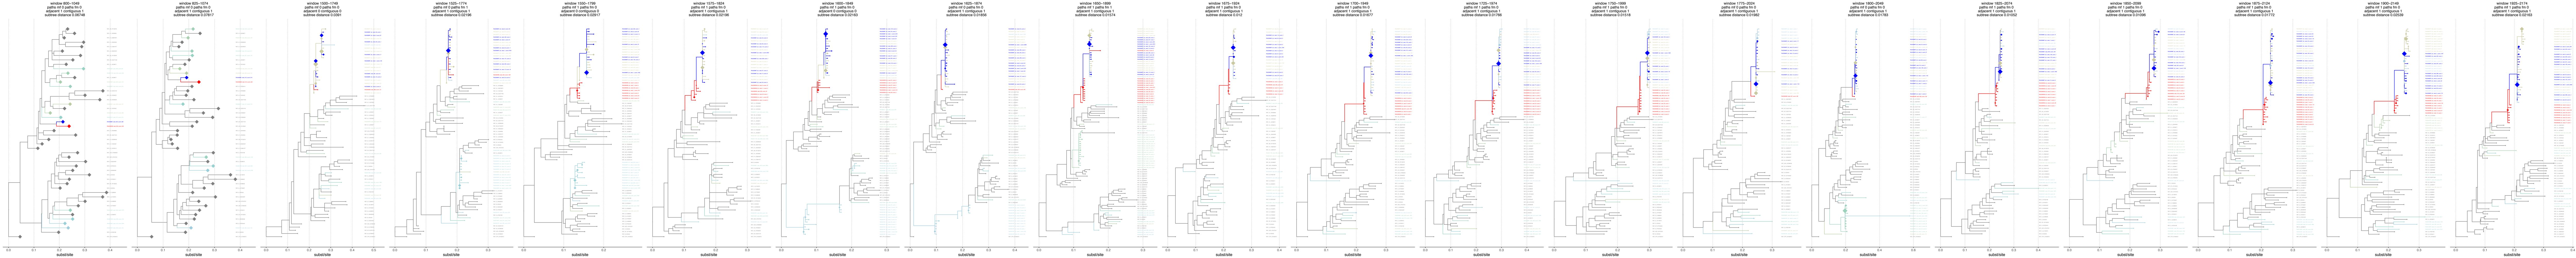

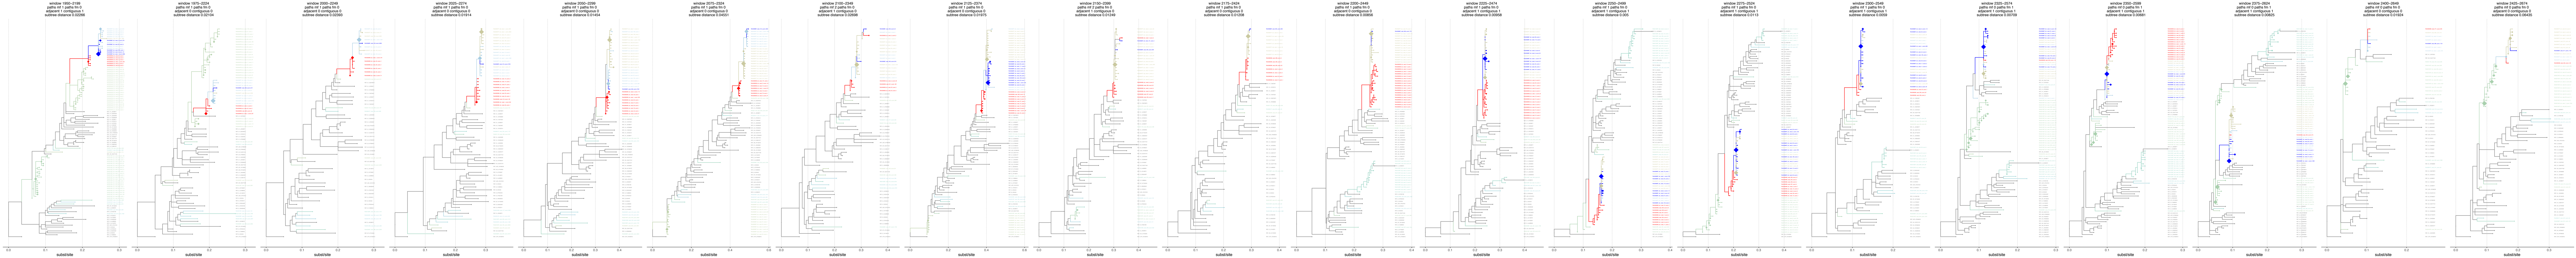

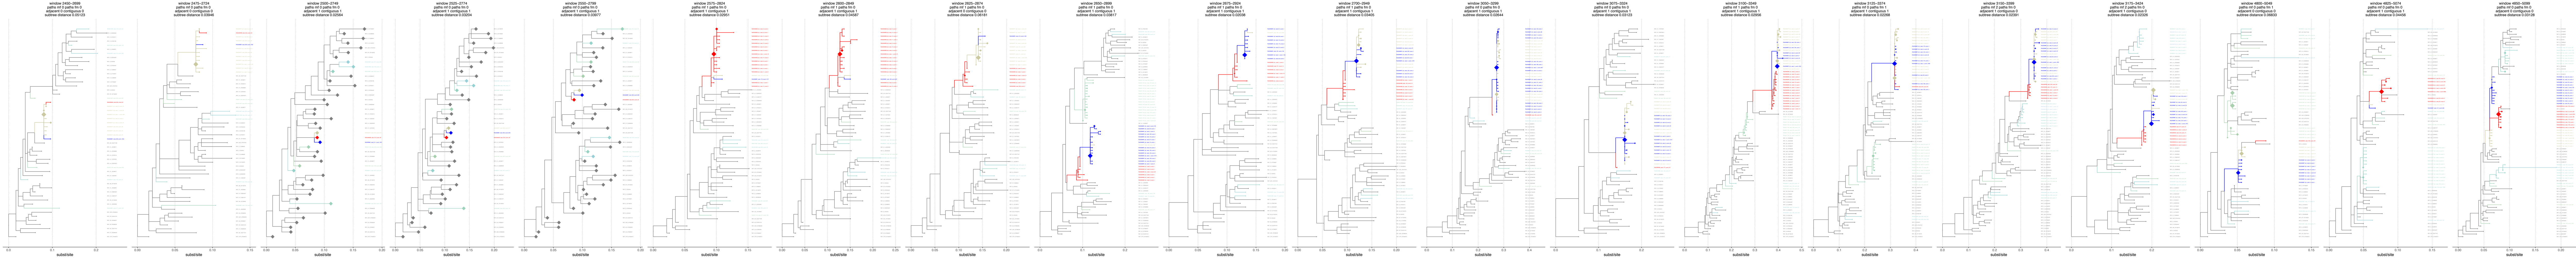

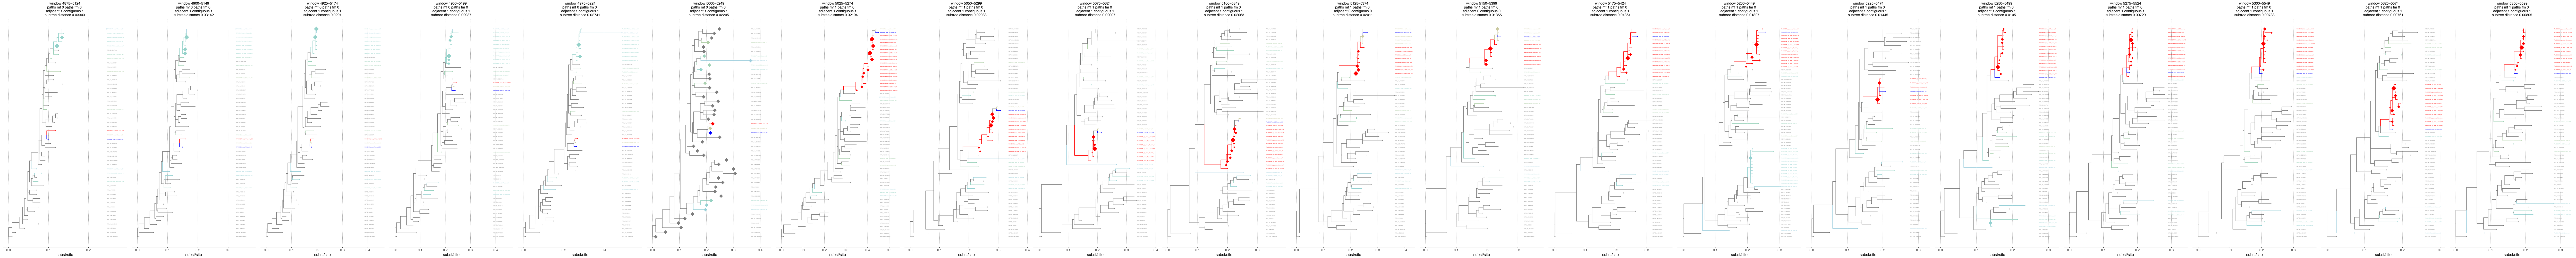

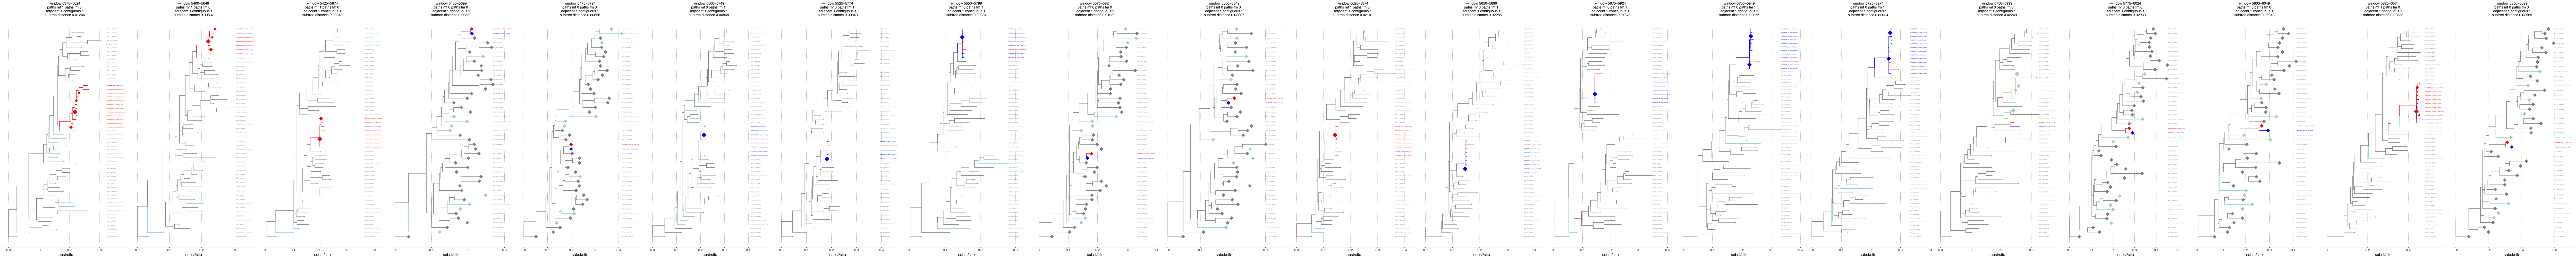

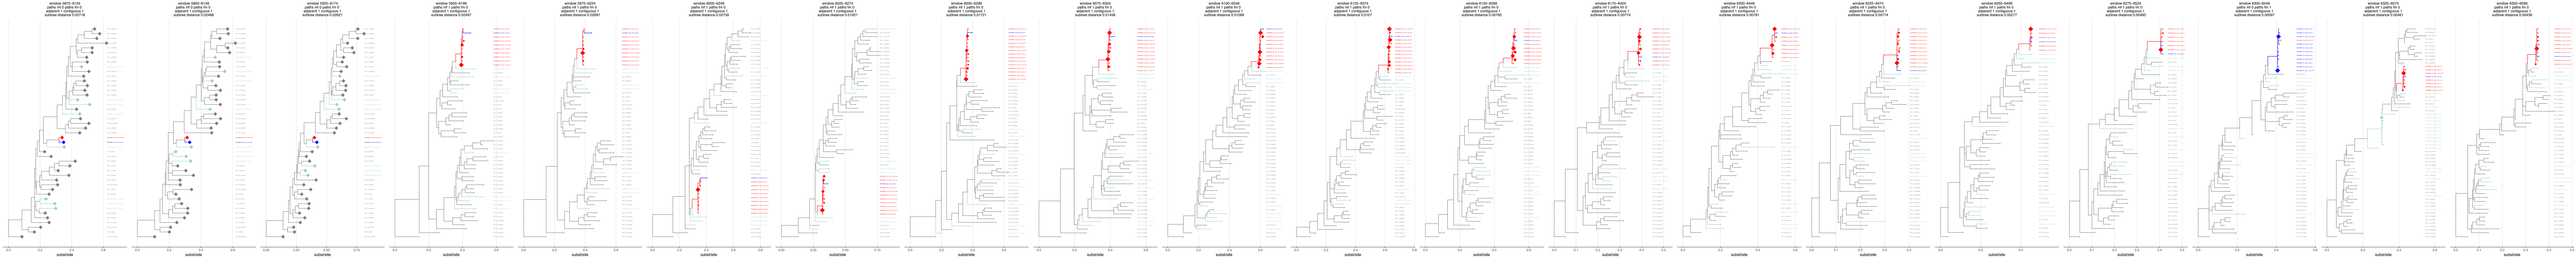

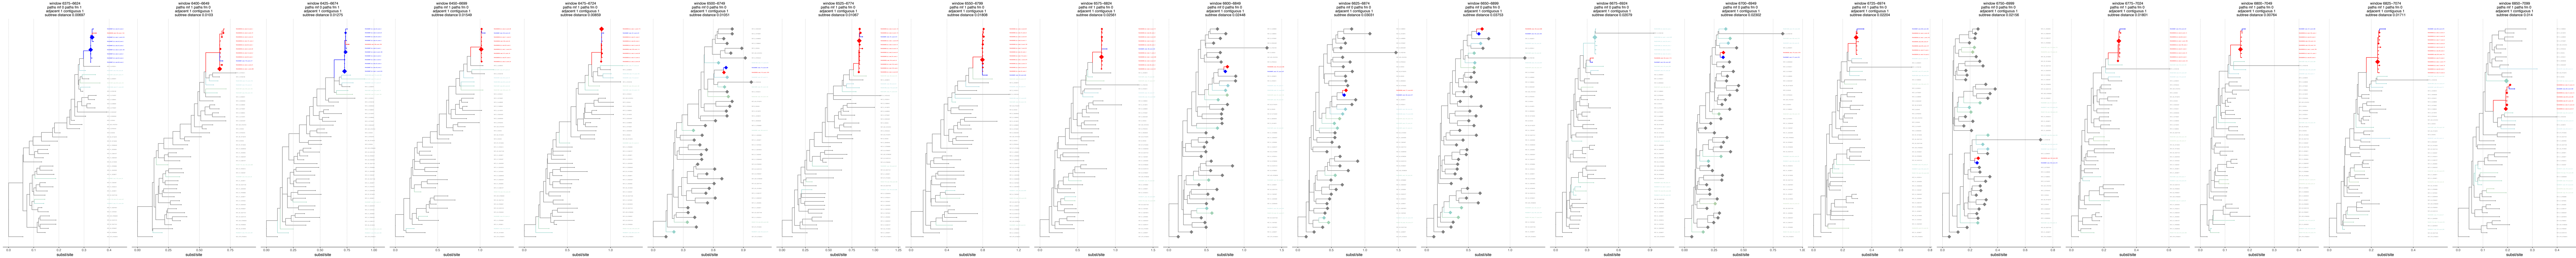

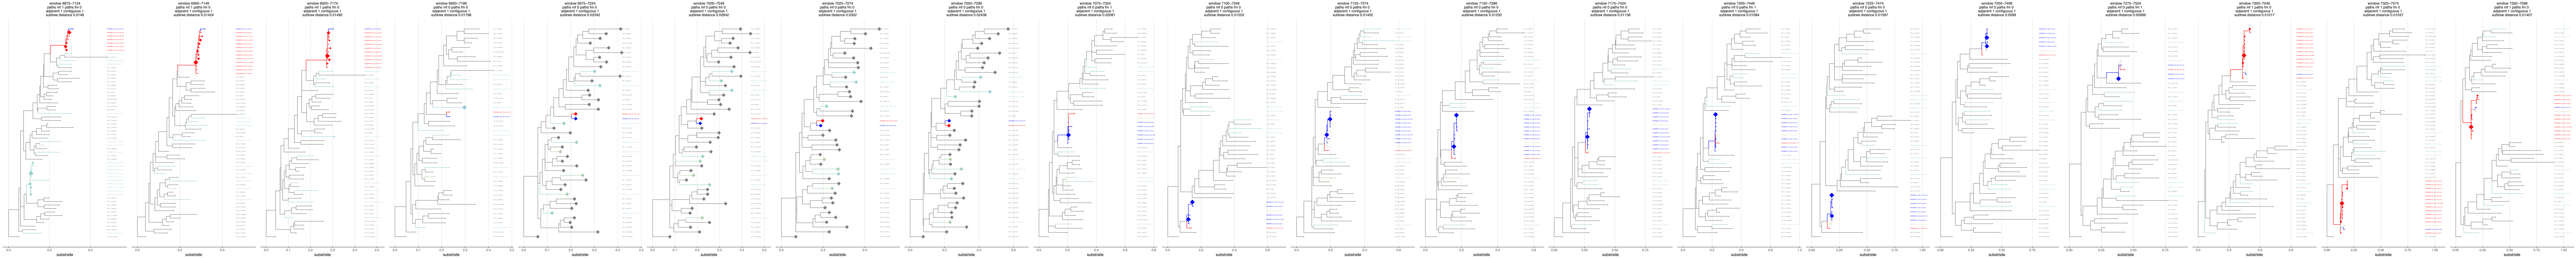

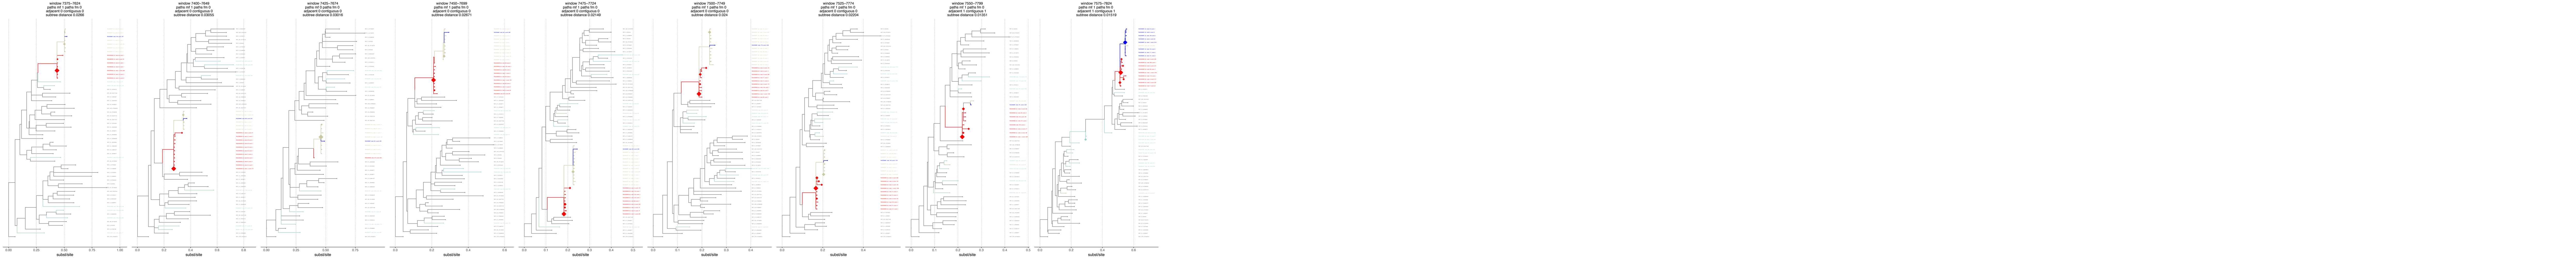

Deep sequence phylogenies  
of male-female pair RkA02918M, RkA02908F (run 83)  
for whom the phylogenetically inferred direction of transmission was inconsistent with clinical data.

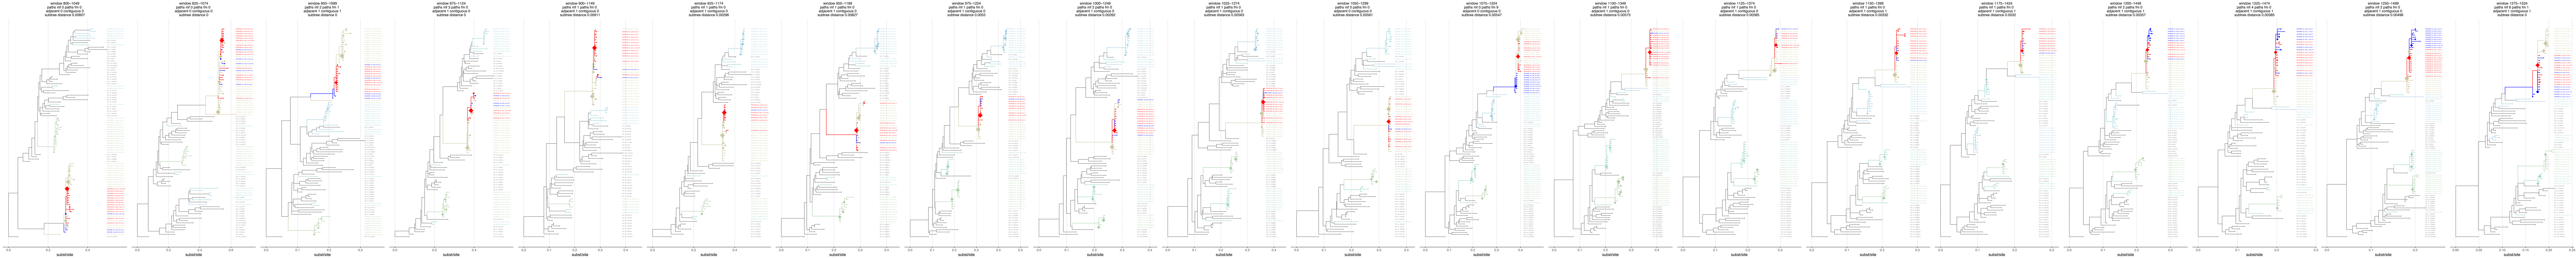

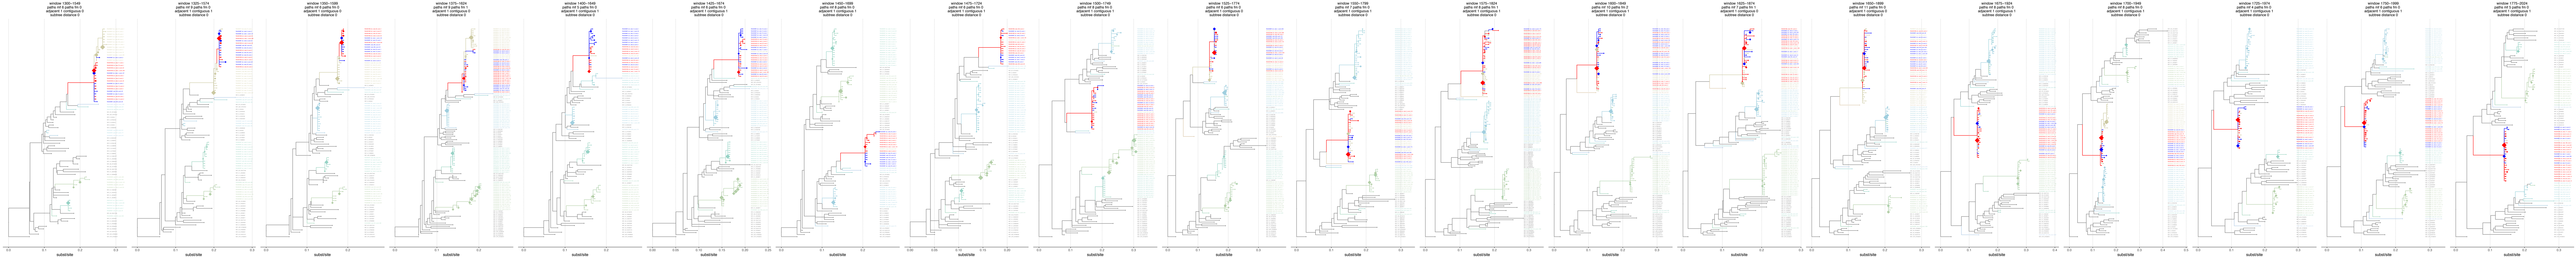

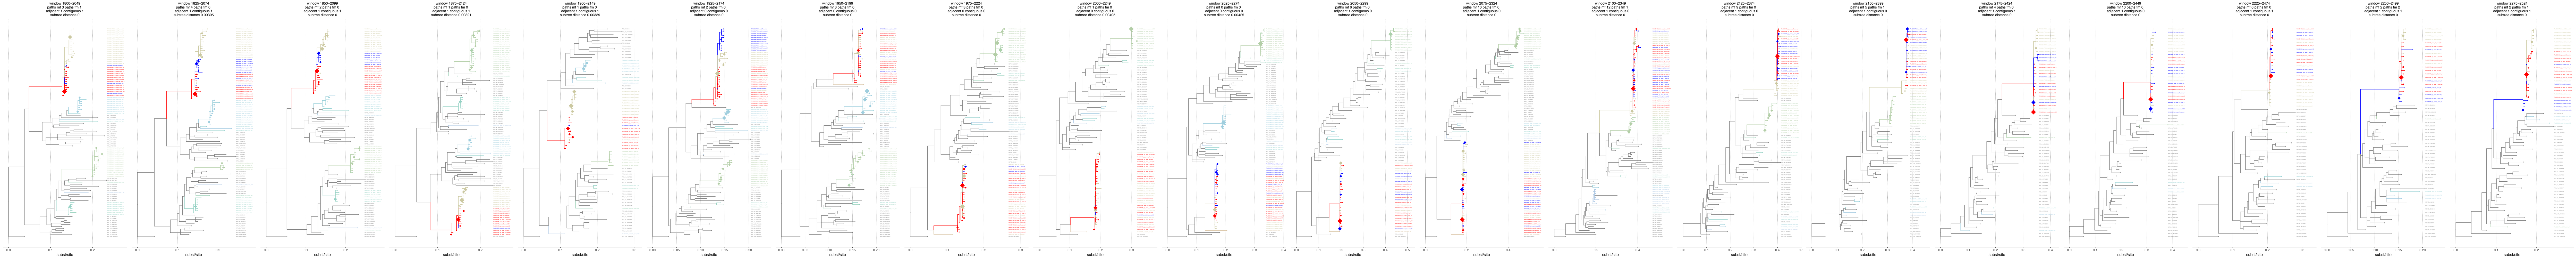

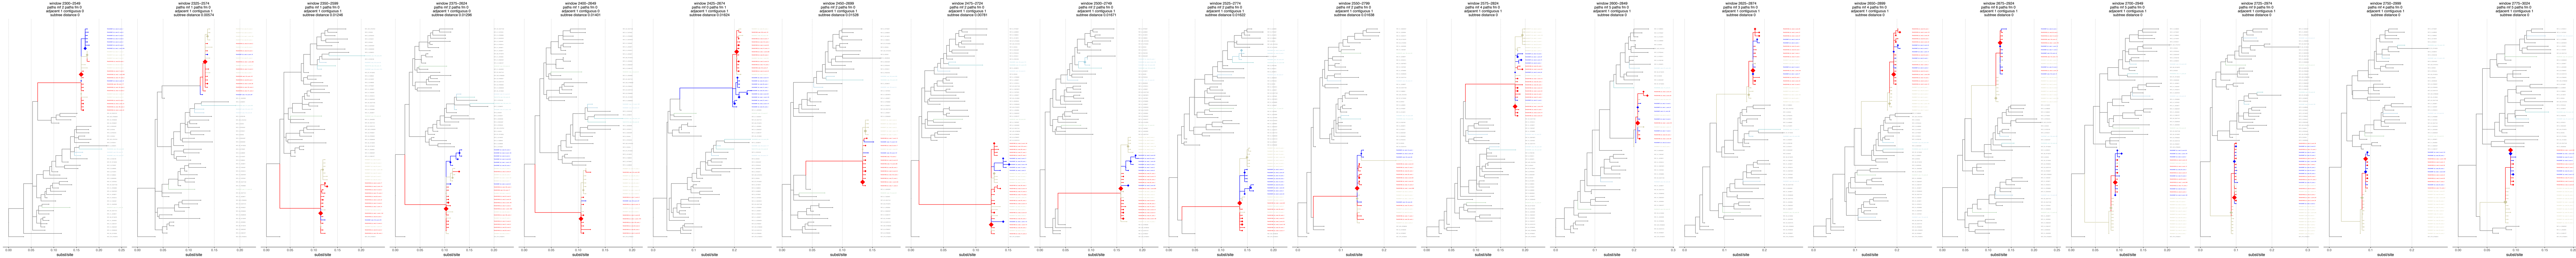

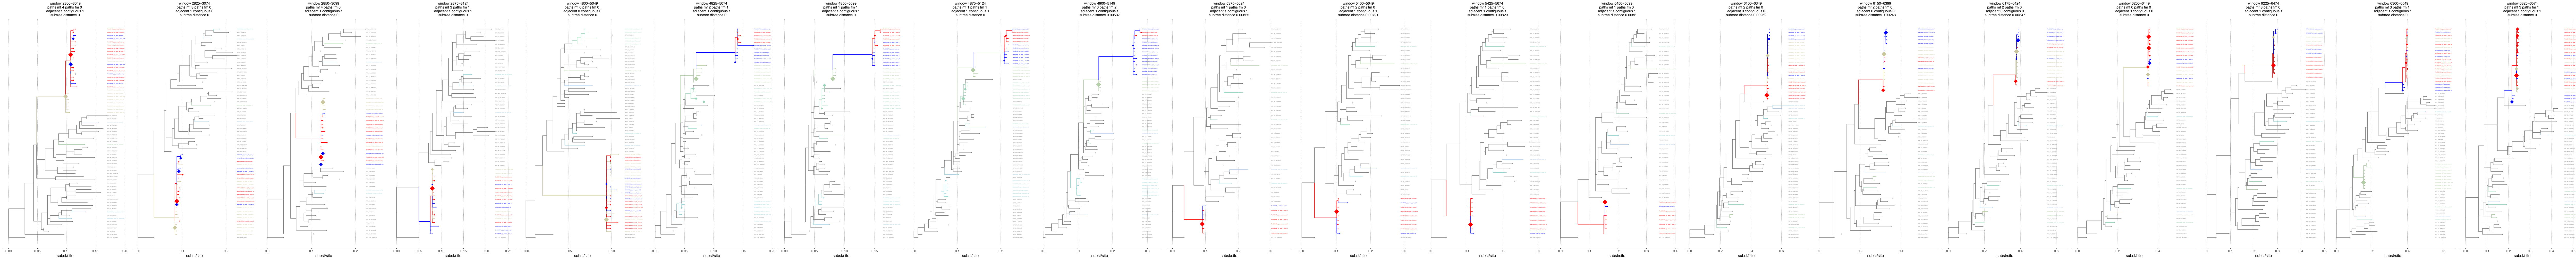

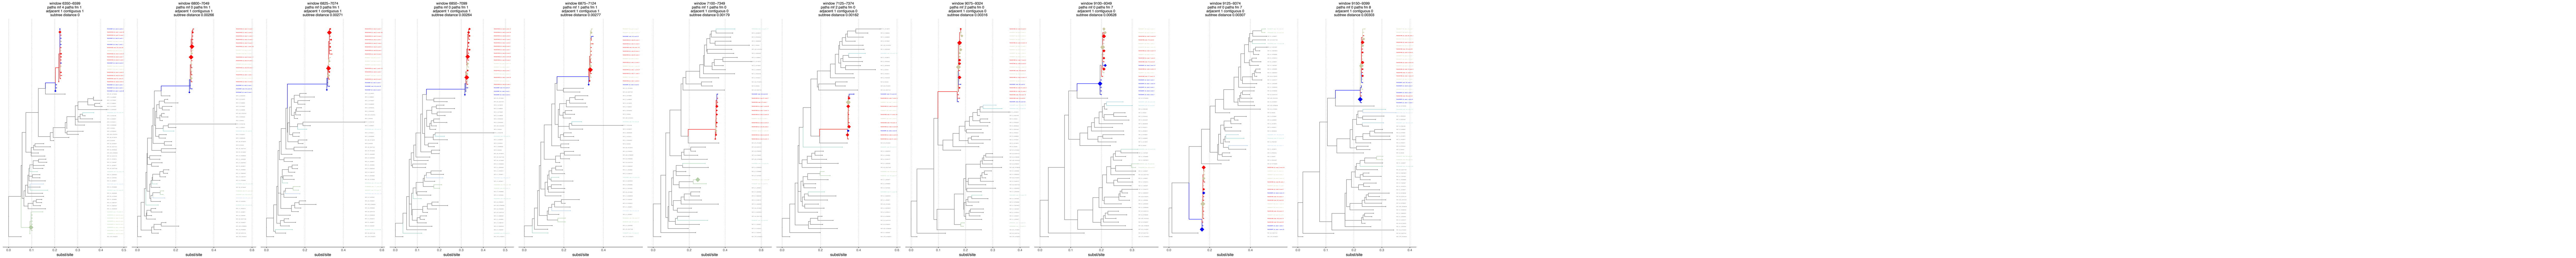

Deep sequence phylogenies  
of male-female pair RkA07475M, RkA03573F (run 204)  
for whom the phylogenetically inferred direction of transmission was inconsistent with clinical data.

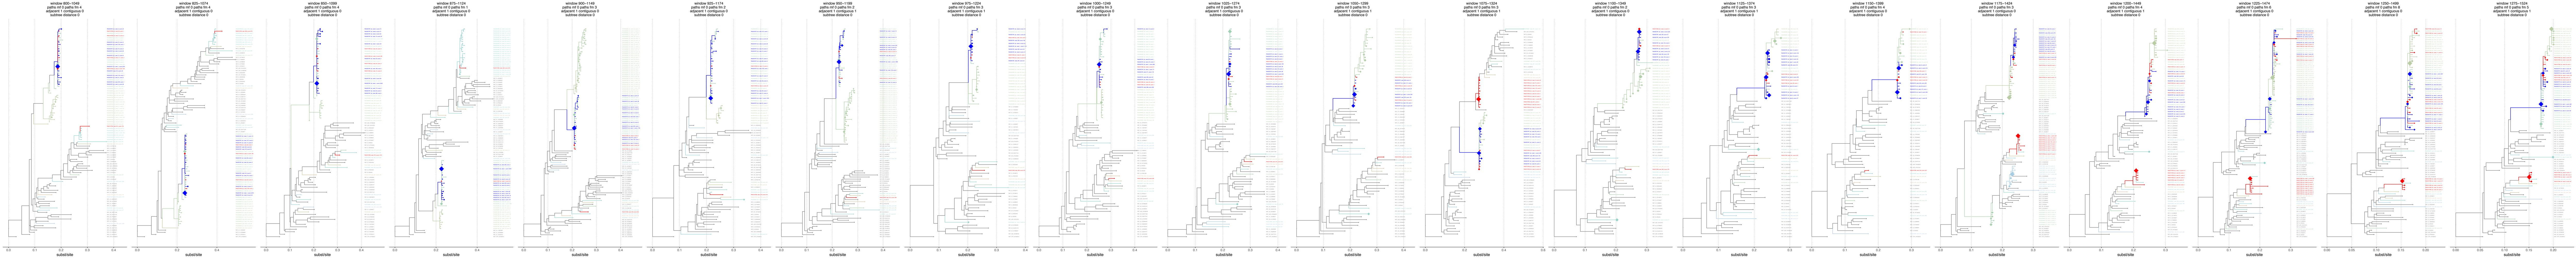

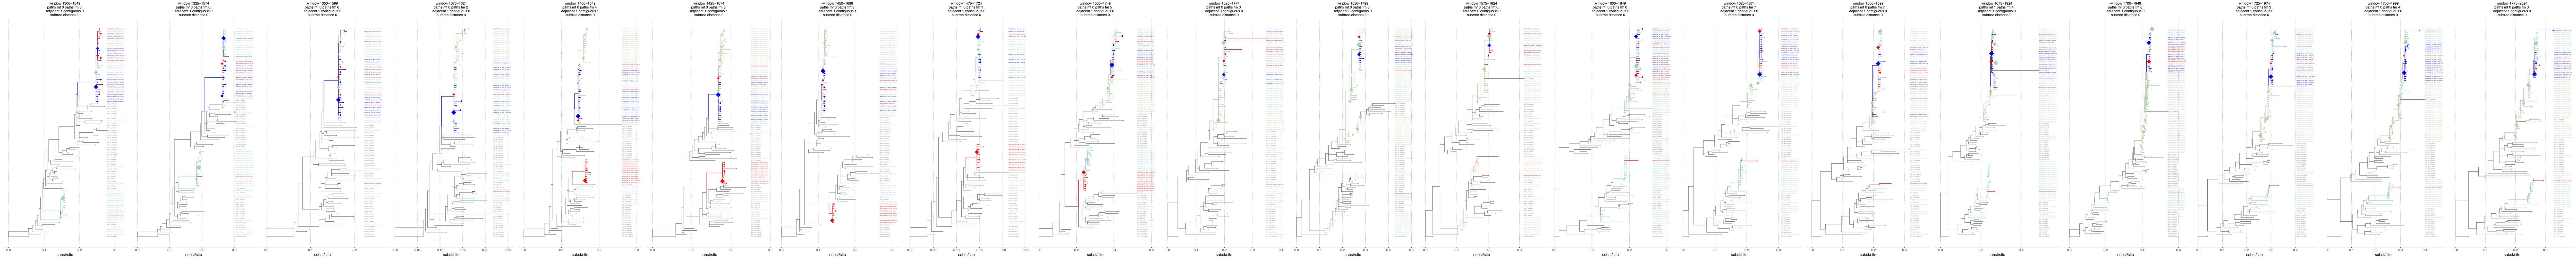

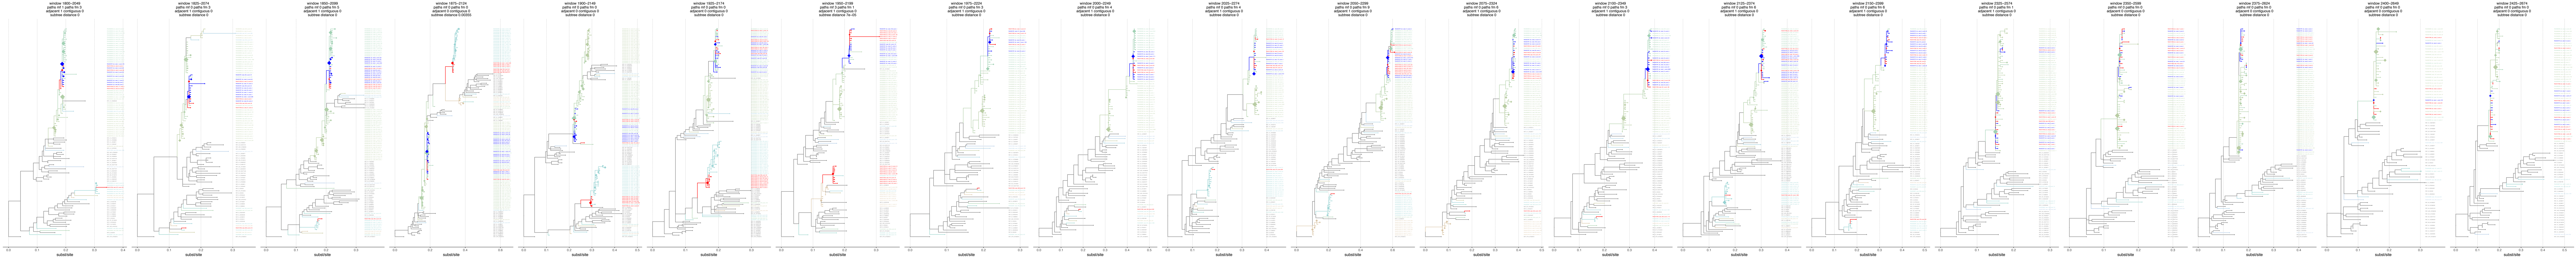

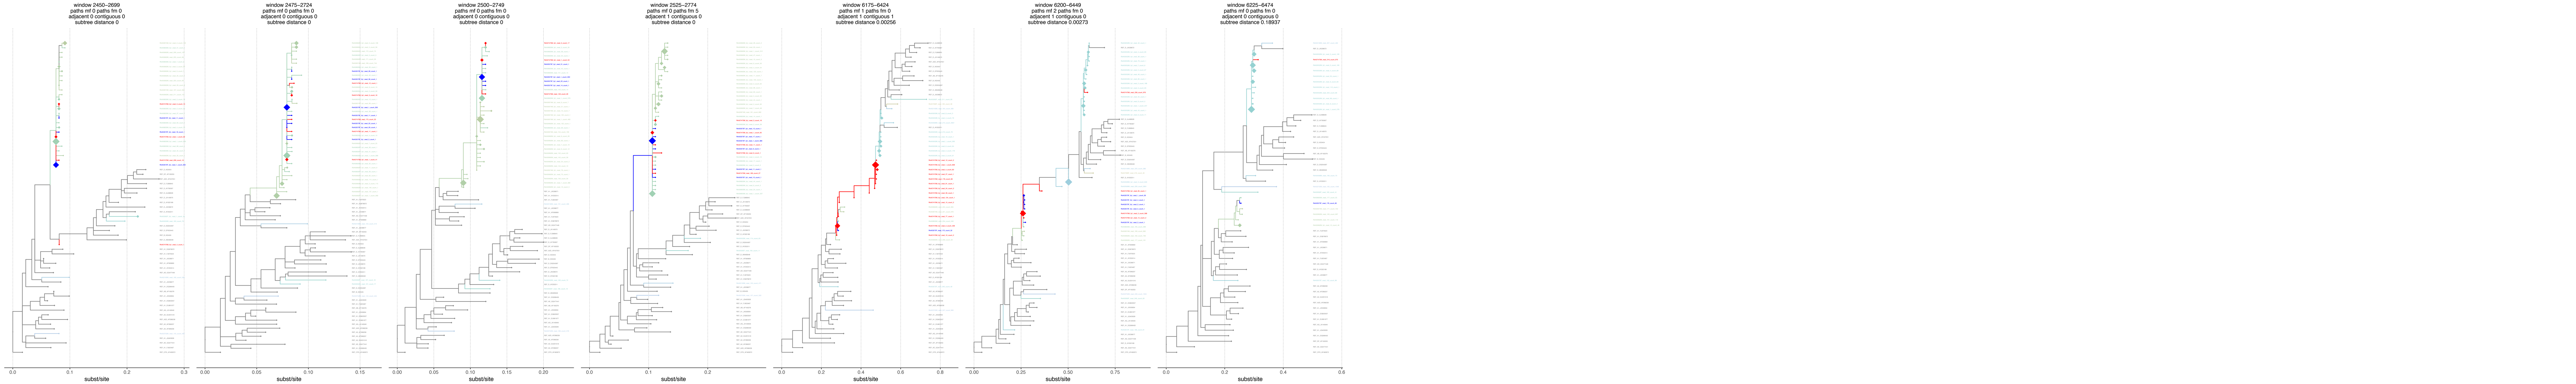

Deep sequence phylogenies  
of male-female pair RkA00507M, RkA05021F (run 273)  
for whom the phylogenetically inferred direction of transmission was inconsistent with clinical data.

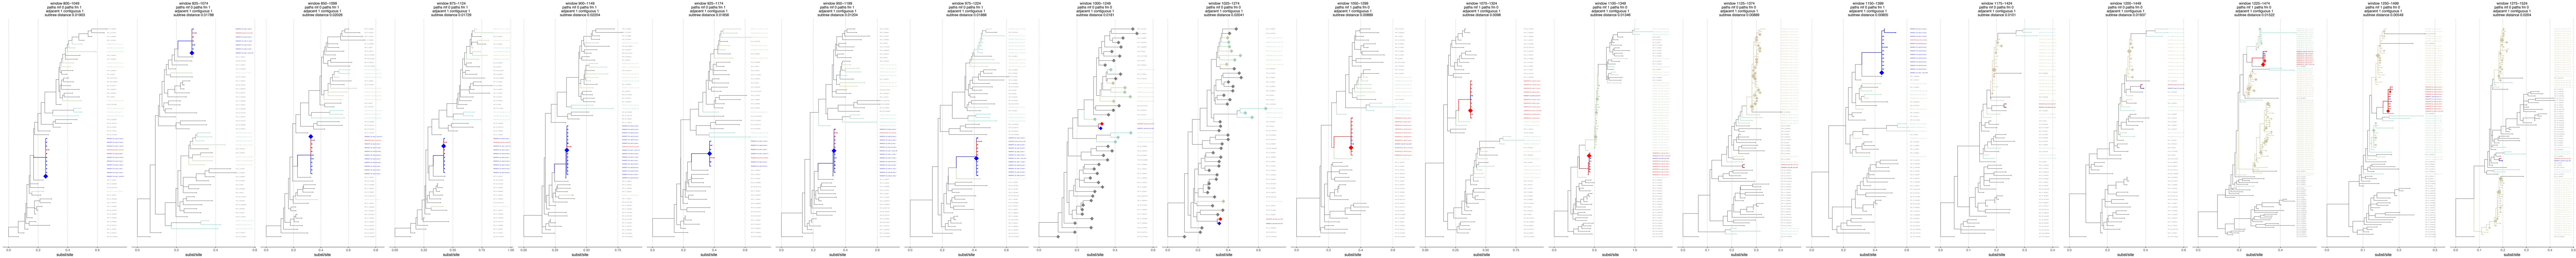

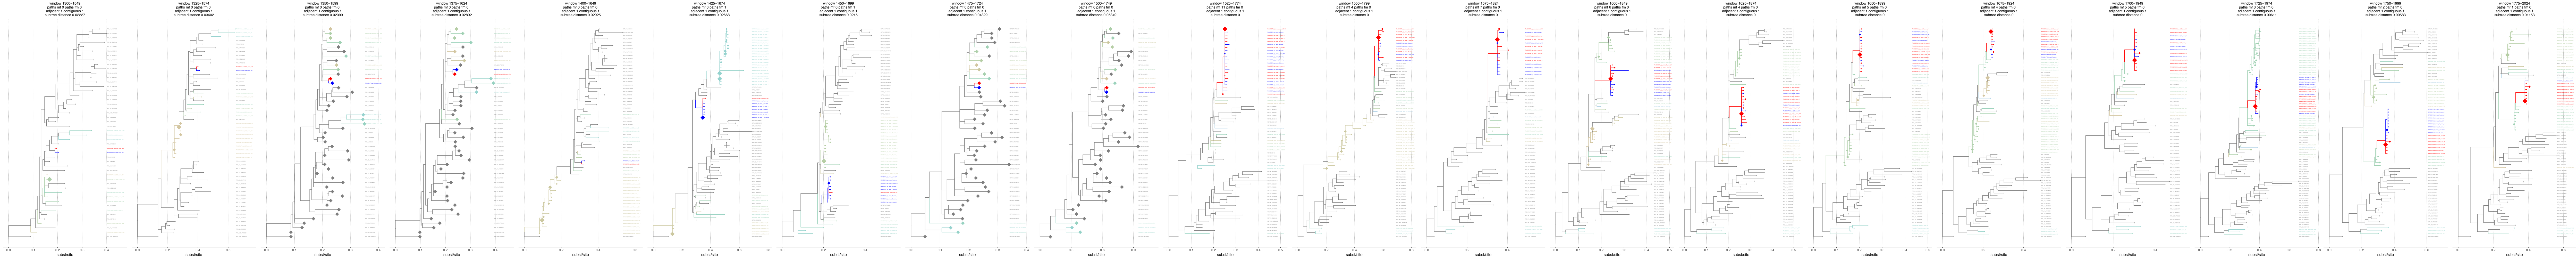

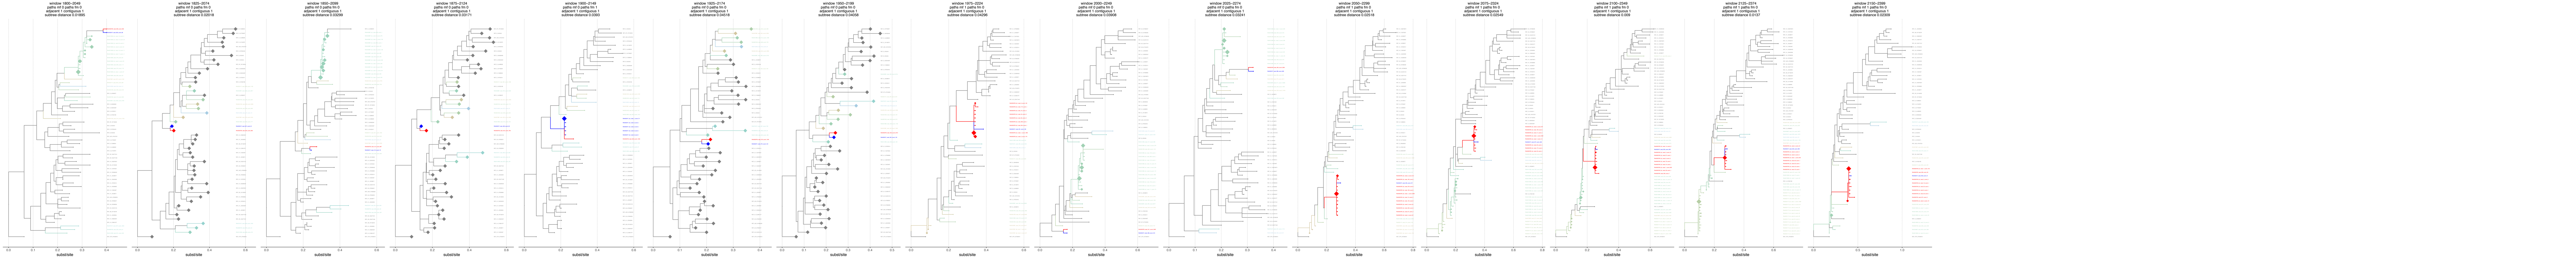

Supplement: Supplementary file 4 — Supplementary Data 2 [file 41467_2019_9139_MOESM4_ESM.pdf]
