# Supplementary material for: Inferring HIV-1 transmission networks and sources of epidemic spread in Africa with deep-sequence phylogenetic analysis
Source: PubMed Central journal article supplement (PMC6441045; doi:10.1038/s41467-019-09139-4), 2019-03-29
Supplement: 41467_2019_9139_MOESM2_ESM.pdf [file 41467_2019_9139_MOESM2_ESM.pdf]

1  
2  
3  
4  
5  
6  
7  
8  
9  
10

## Description of Additional Supplementary Files

**File:** Supplementary Data 1

**Description:** Deep-sequence phylogenies of female-female pairs with near identical and intermingled subgraphs.

**File:** Supplementary Data 2

**Description:** Deep-sequence phylogenies of the nine male-female pairs for whom the phylogenetically inferred direction of transmission was inconsistent with clinical data.
